# Supplementary material for: Nickel-catalyzed regioselective C–H oxygenation: new routes for versatile C–O bond formation
Source: Royal Society of Chemistry journal article supplement (doi:10.1039/c8qo01274a), 2019-01-01
Supplement: c8qo01274a1.pdf [file c8qo01274a1.pdf]

# **Nickel-Catalyzed Regioselective C–H Oxygenation: New Routes for Versatile C–O Bond Formation**

Ze-lin Li<sup>a</sup>, Kang-kang Sun<sup>a</sup>, and Chun Cai<sup>\*a</sup>

<sup>a</sup> Chemical Engineering College, Nanjing University of Science and Technology, Nanjing 210094, People's Republic of China

Fax: (+86)-25-8431-5030; phone: (+86)-25-8431-5514; e-mail: c.cai@njust.edu.cn

|                                 |           |
|---------------------------------|-----------|
| <b>1. General information</b>   | <b>2</b>  |
| <b>2. General procedure</b>     | <b>2</b>  |
| <b>3. Characterization data</b> | <b>4</b>  |
| <b>4. NMR spectra</b>           | <b>16</b> |

## 1. General information

All compounds are characterized by  $^1\text{H}$  NMR,  $^{13}\text{C}$  NMR and MS. Analytical thin-layer chromatography is performed on glass plates precoated with silica gel impregnated with a fluorescent indicator (254 nm), and the plates are visualized by exposure to ultraviolet light.  $^1\text{H}$  NMR and  $^{13}\text{C}$  NMR spectra are recorded on an AVANCE 500 Bruker spectrometer operating at 500 MHz and 125 MHz in  $\text{CDCl}_3$ , respectively, and chemical shifts are reported in ppm. GC analyses are performed on an Agilent 7890A instrument (Column: Agilent 19091J-413:30 m  $\times$  320  $\mu\text{m}$   $\times$  0.25  $\mu\text{m}$ , H, FID detection). GC-MS data was recorded on a 5975C Mass Selective Detector, coupled with a 7890A Gas Chromatograph (Agilent Technologies).

## 2. General procedure

**General procedure for C-H oxygenation of chelating arenes with iodobenzene diacetate:** To a mixture of 2-phenylpyridine (77.5 mg, 0.5 mmol) **1a**,  $\text{Ni}(\text{acac})_2$  (25.7 mg, 0.1 mmol, 20 mol %), ligand  $\text{MePh}_2\text{P}$  (20.0 mg, 0.1 mmol, 20 mol %), and  $\text{PhI}(\text{OAc})_2$  (483.2 mg, 0.75 mmol, 1.5 equiv) in a reaction tube was added solvent ( $\text{CH}_3\text{CN}$ =2.0 mL). The reaction mixture was stirred at 115  $^\circ\text{C}$  for 24 h in air. The reaction mixture was extracted with ethyl acetate (15 mL  $\times$  3). The combined organic layers were washed with brine (30 mL  $\times$  1), dried over  $\text{MgSO}_4$ , and concentrated in vacuo. The residue was purified by column chromatography on silica gel to afford the desired products **2a**.

**General procedure for C-H oxygenation of chelating arenes with alcohols:** To a mixture of 2-phenylpyridine (77.5 mg, 0.5 mmol) **1a**,  $\text{Ni}(\text{acac})_2$  (25.7 mg, 0.1 mmol, 20 mol %), ligand  $\text{MePh}_2\text{P}$  (20.0 mg, 0.1 mmol, 20 mol %), and additive  $\text{AgO}_2\text{CCF}_3$  (165.7 mg, 0.75 mmol, 1.5 equiv) in a reaction tube was added solvent ( $\text{CH}_3\text{OH}$ =2.0 mL). The reaction mixture was stirred at 115  $^\circ\text{C}$  for 24 h in  $\text{O}_2$ . The reaction mixture was extracted with ethyl acetate (15 mL  $\times$  3). The combined organic layers were washed with brine (30 mL  $\times$  1), dried over  $\text{MgSO}_4$ , and concentrated in vacuo. The residue was purified by column chromatography on silica gel to afford the desired products **3a**.

**General procedure for C-H oxygenation of chelating arenes with benzoic acids:** To a mixture of 2-phenylpyridine (77.5 mg, 0.5 mmol) **1a**,  $\text{Ni}(\text{acac})_2$  (25.7 mg, 0.1 mmol, 20 mol %), ligand  $\text{MePh}_2\text{P}$  (20.0 mg, 0.1 mmol, 20 mol %), and  $\text{PhCOOH}$  (91.6 mg, 0.75 mmol, 1.5 equiv) in a reaction tube was added solvent ( $\text{NMP}$ =2.0 mL). The reaction mixture was stirred at 130  $^\circ\text{C}$  for 24 h in  $\text{O}_2$ . The reaction mixture was extracted with ethyl acetate (15 mL  $\times$  3). The combined organic layers were washed with brine (30 mL  $\times$  1), dried over  $\text{MgSO}_4$ , and concentrated in vacuo. The residue was purified by column chromatography on silica gel to afford the desired products **4a**.

**Table S1.** Optimization of the reaction conditions<sup>a</sup>

| Entry | Cat.                                        | O source                        | Additive                          | Solvent            | 2a/3a/4a(%) <sup>b</sup> |
|-------|---------------------------------------------|---------------------------------|-----------------------------------|--------------------|--------------------------|
| 1     | Ni(acac) <sub>2</sub> / MePh <sub>2</sub> P | CH <sub>3</sub> OH <sup>c</sup> | Cu(OAc) <sub>2</sub>              | CH <sub>3</sub> CN | trace/23/0               |
| 2     | Ni(acac) <sub>2</sub> / MePh <sub>2</sub> P | CH <sub>3</sub> OH <sup>c</sup> | AgOAc                             | CH <sub>3</sub> CN | 0/26/0                   |
| 3     | Ni(acac) <sub>2</sub> / MePh <sub>2</sub> P | CH <sub>3</sub> OH <sup>c</sup> | Ag <sub>2</sub> OCCF <sub>3</sub> | CH <sub>3</sub> CN | 0/41/0                   |
| 4     | Ni(acac) <sub>2</sub> / MePh <sub>2</sub> P | CH <sub>3</sub> OH <sup>c</sup> | Ag <sub>2</sub> CO <sub>3</sub>   | CH <sub>3</sub> CN | 0/13/0                   |
| 5     | Ni(acac) <sub>2</sub> / MePh <sub>2</sub> P | CH <sub>3</sub> OH <sup>c</sup> | AgOPiv                            | CH <sub>3</sub> CN | 0/34/0                   |
| 6     | Ni(acac) <sub>2</sub> / MePh <sub>2</sub> P | CH <sub>3</sub> OH <sup>c</sup> | Ag <sub>2</sub> O                 | CH <sub>3</sub> CN | 0/17/0                   |

<sup>a</sup>Reaction condition: **1a** (0.5 mmol), cat.(0.1 mmol), ligand (0.1 mmol), O source (0.75 mmol), additive (0.75 mmol), solvent (2 mL), 115 °C, 24 h. <sup>b</sup>Isolated yield. <sup>c</sup>(5.0 mmol).

**Table S2.** Optimization of the reaction conditions<sup>a</sup>

| Entry            | Cat.                                        | O source | Additive                          | Solvent            | 2a/3a/4a(%) <sup>b</sup> |
|------------------|---------------------------------------------|----------|-----------------------------------|--------------------|--------------------------|
| 1                | Ni(acac) <sub>2</sub> / MePh <sub>2</sub> P | PhCOOH   | Ag <sub>2</sub> OCCF <sub>3</sub> | CH <sub>3</sub> OH | 0/38/0                   |
| 2                | Ni(acac) <sub>2</sub> / MePh <sub>2</sub> P | PhCOOH   | Ag <sub>2</sub> OCCF <sub>3</sub> | CH <sub>3</sub> CN | 0/0/<5                   |
| 3                | Ni(acac) <sub>2</sub> / MePh <sub>2</sub> P | PhCOOH   | Ag <sub>2</sub> OCCF <sub>3</sub> | PhCl               | 0/0/37                   |
| 4                | Ni(acac) <sub>2</sub> / MePh <sub>2</sub> P | PhCOOH   | Ag <sub>2</sub> OCCF <sub>3</sub> | NMP                | 0/0/49                   |
| 5 <sup>f</sup>   | Ni(acac) <sub>2</sub> / MePh <sub>2</sub> P | PhCOOH   | Ag <sub>2</sub> OCCF <sub>3</sub> | NMP                | 0/0/60                   |
| 6 <sup>d,f</sup> | Ni(acac) <sub>2</sub> / MePh <sub>2</sub> P | PhCOOH   | Ag <sub>2</sub> OCCF <sub>3</sub> | NMP                | 0/0/67                   |
| 7 <sup>d,f</sup> | Ni(acac) <sub>2</sub> / MePh <sub>2</sub> P | PhCOOH   | -                                 | NMP                | 0/0/68                   |
| 8 <sup>f,h</sup> | Ni(acac) <sub>2</sub> / MePh <sub>2</sub> P | PhCOOH   | -                                 | NMP                | 0/0/65                   |

<sup>a</sup>Reaction condition: **1a** (0.5 mmol), cat.(0.1 mmol), ligand (0.1 mmol), O source (0.75 mmol), additive (0.75 mmol), solvent (2 mL), 115 °C, 24 h. <sup>b</sup>Isolated yield. <sup>d</sup>130 °C. <sup>e</sup>100°C. <sup>f</sup>O<sub>2</sub> atmosphere. <sup>g</sup>Ar atmosphere. <sup>h</sup>145°C

### 3. Characterization data

#### 2-(pyridin-2-yl)phenyl acetate (2a)

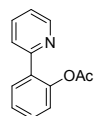

Formula: C<sub>13</sub>H<sub>11</sub>NO<sub>2</sub>  
Mass: 213

To a mixture of 2-phenylpyridine (77.5 mg, 0.5 mmol) **1a**, Ni(acac)<sub>2</sub> (25.7 mg, 0.1 mmol, 20 mol %), ligand MePh<sub>2</sub>P (20.0 mg, 0.1 mmol, 20 mol %), and PhI(OAc)<sub>2</sub> (483.2 mg, 0.75 mmol, 1.5 equiv) in a reaction tube was added solvent (CH<sub>3</sub>CN=2.0 mL). The reaction mixture was stirred at 115 °C for 24 h in air. Following the general procedure, **2a** was purified by column chromatography on silica gel (petroleum ether: ethyl acetate = 5:1) as a white solid (80.9 mg, 76%). <sup>1</sup>H NMR (500 MHz, Chloroform-*d*) δ 8.8 – 8.7 (m, 1H), 7.8 – 7.7 (m, 2H), 7.6 (dd, *J* = 7.9, 1.1 Hz, 1H), 7.5 (td, *J* = 7.7, 1.7 Hz, 1H), 7.4 (td, *J* = 7.5, 1.2 Hz, 1H), 7.3 – 7.3 (m, 1H), 7.2 (dd, *J* = 8.0, 1.2 Hz, 1H), 2.2 (s, 3H). <sup>13</sup>C NMR (126 MHz, Chloroform-*d*) δ 168.4, 154.9, 148.6, 147.1, 135.3, 132.2, 129.8, 128.7, 125.4, 122.6, 122.3, 121.2, 20.0. GC-MS (EI) *m/z*: 213.

#### 5-methyl-2-(pyridin-2-yl)phenyl acetate (2b)

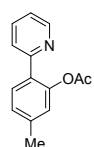

Formula: C<sub>14</sub>H<sub>13</sub>NO<sub>2</sub>  
Mass: 227

To a mixture of 2-(p-tolyl)pyridine (84.5 mg, 0.5 mmol) **1b**, Ni(acac)<sub>2</sub> (25.7 mg, 0.1 mmol, 20 mol %), ligand MePh<sub>2</sub>P (20.0 mg, 0.1 mmol, 20 mol %), and PhI(OAc)<sub>2</sub> (483.2 mg, 0.75 mmol, 1.5 equiv) in a reaction tube was added solvent (CH<sub>3</sub>CN=2.0 mL). The reaction mixture was stirred at 115 °C for 24 h in air. Following the general procedure, **2b** was purified by column chromatography on silica gel (petroleum ether: ethyl acetate = 5:1) as a white solid (73.8 mg, 65%). <sup>1</sup>H NMR (500 MHz, Chloroform-*d*) δ 8.75 – 8.69 (m, 1H), 7.76 (td, *J* = 7.8, 1.8 Hz, 1H), 7.64 (d, *J* = 7.9 Hz, 1H), 7.56 (d, *J* = 7.9 Hz, 1H), 7.28 – 7.24 (m, 1H), 7.20 (dd, *J* = 7.9, 1.6 Hz, 1H), 7.01 (d, *J* = 1.6 Hz, 1H), 2.44 (s, 3H), 2.21 (s, 3H). <sup>13</sup>C NMR (126 MHz, Chloroform-*d*) δ 168.6, 154.8, 148.4, 146.9, 139.3, 135.4, 129.6, 129.0, 126.3, 122.7, 122.6, 121.0, 20.2, 20.0. GC-MS (EI) *m/z*: 227.

#### 5-chloro-2-(pyridin-2-yl)phenyl acetate (2c)

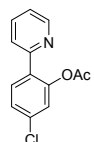

Formula: C<sub>13</sub>H<sub>10</sub>ClNO<sub>2</sub>  
Mass: 247

To a mixture of 2-(4-chlorophenyl)pyridine (94.5 mg, 0.5 mmol) **1c**, Ni(acac)<sub>2</sub> (25.7 mg, 0.1 mmol, 20 mol %), ligand MePh<sub>2</sub>P (20.0 mg, 0.1 mmol, 20 mol %), and PhI(OAc)<sub>2</sub> (483.2 mg, 0.75 mmol, 1.5 equiv) in a reaction tube was added solvent (CH<sub>3</sub>CN=2.0 mL). The reaction mixture was stirred at 115 °C for 24 h in air. Following

the general procedure, **2c** was purified by column chromatography on silica gel (petroleum ether: ethyl acetate = 5:1) as a white solid (95.1 mg, 77%). <sup>1</sup>H NMR (500 MHz, Chloroform-*d*) δ 8.55 – 8.51 (m, 1H), 7.89 (d, *J* = 1.7 Hz, 2H), 7.75 – 7.72 (m, 1H), 7.29 (d, *J* = 1.9 Hz, 1H), 7.07 (d, *J* = 2.0 Hz, 1H), 6.91 (d, *J* = 8.6 Hz, 1H), 2.22 (s, 3H). <sup>13</sup>C NMR (126 MHz, Chloroform-*d*) δ 159.9, 156.1, 144.8, 137.0, 135.7, 130.7, 126.0, 122.8, 120.8, 118.1, 117.6, 116.4, 19.9. GC-MS (EI) *m/z*: 247.

### 5-bromo-2-(pyridin-2-yl)phenyl acetate (**2d**)

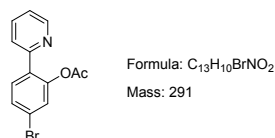

To a mixture of 2-(4-bromophenyl)pyridine (116.5 mg, 0.5 mmol) **1d**, Ni(acac)<sub>2</sub> (25.7 mg, 0.1 mmol, 20 mol %), ligand MePh<sub>2</sub>P (20.0 mg, 0.1 mmol, 20 mol %), and PhI(OAc)<sub>2</sub> (483.2 mg, 0.75 mmol, 1.5 equiv) in a reaction tube was added solvent (CH<sub>3</sub>CN=2.0 mL). The reaction mixture was stirred at 115 °C for 24 h in air. Following the general procedure, **2d** was purified by column chromatography on silica gel (petroleum ether: ethyl acetate = 5:1) as a white solid (101.9 mg, 70%). <sup>1</sup>H NMR (500 MHz, Chloroform-*d*) δ 8.73 (d, *J* = 4.8 Hz, 1H), 7.94 – 7.84 (m, 1H), 7.78 (tt, *J* = 7.8, 1.7 Hz, 1H), 7.63 (dd, *J* = 8.3, 1.4 Hz, 1H), 7.52 (dd, *J* = 8.3, 1.8 Hz, 1H), 7.39 (s, 1H), 7.30 (td, *J* = 5.1, 4.5, 3.0 Hz, 1H), 2.21 (s, 3H). <sup>13</sup>C NMR (126 MHz, Chloroform-*d*) δ 167.9, 153.8, 148.7, 147.5, 144.9, 135.5, 130.9, 128.6, 125.6, 122.5, 121.5, 118.0, 19.9. GC-MS (EI) *m/z*: 291.

### 5-formyl-2-(pyridin-2-yl)phenyl acetate (**2e**)

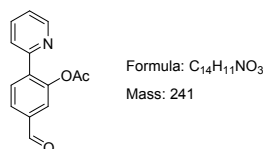

To a mixture of 4-(pyridin-2-yl)benzaldehyde (91.5 mg, 0.5 mmol) **1e**, Ni(acac)<sub>2</sub> (25.7 mg, 0.1 mmol, 20 mol %), ligand MePh<sub>2</sub>P (20.0 mg, 0.1 mmol, 20 mol %), and PhI(OAc)<sub>2</sub> (483.2 mg, 0.75 mmol, 1.5 equiv) in a reaction tube was added solvent (CH<sub>3</sub>CN=2.0 mL). The reaction mixture was stirred at 115 °C for 24 h in air. Following the general procedure, **2e** was purified by column chromatography on silica gel (petroleum ether: ethyl acetate = 5:1) as a white solid (86.8 mg, 72%). <sup>1</sup>H NMR (500 MHz, Chloroform-*d*) δ 10.04 (s, 1H), 8.73 (d, *J* = 4.8 Hz, 1H), 7.88 (q, *J* = 8.0 Hz, 2H), 7.79 (td, *J* = 7.7, 1.8 Hz, 1H), 7.69 (s, 1H), 7.60 (d, *J* = 8.0 Hz, 1H), 7.31 (dd, *J* = 7.6, 4.9 Hz, 1H), 2.21 (s, 3H). <sup>13</sup>C NMR (126 MHz, Chloroform-*d*) δ 190.9, 169.1, 154.5, 149.8, 148.7, 138.7, 137.4, 136.6, 131.7, 127.4, 124.3, 123.9, 123.0, 20.9. GC-MS (EI) *m/z*: 241.

### 3-methyl-2-(pyridin-2-yl)phenyl acetate (**2f**)

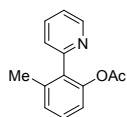

Formula:  $C_{14}H_{13}NO_2$   
Mass: 227

To a mixture of 2-(o-tolyl)pyridine (84.5 mg, 0.5 mmol) **1f**,  $Ni(acac)_2$  (25.7 mg, 0.1 mmol, 20 mol %), ligand  $MePh_2P$  (20.0 mg, 0.1 mmol, 20 mol %), and  $PhI(OAc)_2$  (483.2 mg, 0.75 mmol, 1.5 equiv) in a reaction tube was added solvent ( $CH_3CN=2.0$  mL). The reaction mixture was stirred at 115 °C for 24 h in air. Following the general procedure, **2f** was purified by column chromatography on silica gel (petroleum ether: ethyl acetate = 5:1) as a white solid (78.3 mg, 69%).  $^1H$  NMR (500 MHz, Chloroform-*d*)  $\delta$  8.55 – 8.47 (m, 1H), 7.62 – 7.54 (m, 1H), 7.43 (td,  $J = 7.7, 2.0$  Hz, 1H), 7.35 (ddd,  $J = 20.0, 7.5, 1.6$  Hz, 2H), 7.20 (dd,  $J = 7.9, 4.8$  Hz, 2H), 2.20 (s, 3H), 1.96 (s, 3H).  $^{13}C$  NMR (126 MHz, Chloroform-*d*)  $\delta$  168.9, 155.4, 148.2, 146.6, 138.1, 133.3, 132.4, 130.5, 129.4, 125.9, 122.7, 122.6, 20.6, 19.1. GC-MS (EI)  $m/z$ : 227.

#### 4-bromo-2-(pyridin-2-yl)phenyl acetate (2g)

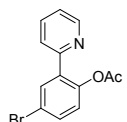

Formula:  $C_{13}H_{10}BrNO_2$   
Mass: 291

To a mixture of 2-(3-bromophenyl)pyridine (116.5 mg, 0.5 mmol) **1g**,  $Ni(acac)_2$  (25.7 mg, 0.1 mmol, 20 mol %), ligand  $MePh_2P$  (20.0 mg, 0.1 mmol, 20 mol %), and  $PhI(OAc)_2$  (483.2 mg, 0.75 mmol, 1.5 equiv) in a reaction tube was added solvent ( $CH_3CN=2.0$  mL). The reaction mixture was stirred at 115 °C for 24 h in air. Following the general procedure, **2g** was purified by column chromatography on silica gel (petroleum ether: ethyl acetate = 5:1) as a white solid (88.8 mg, 61%).  $^1H$  NMR (500 MHz, Chloroform-*d*)  $\delta$  8.75 (s, 1H), 7.98 – 7.86 (m, 2H), 7.81 (td,  $J = 7.7, 1.8$  Hz, 1H), 7.58 (dd,  $J = 8.6, 2.4$  Hz, 1H), 7.41 (dd,  $J = 8.7, 2.4$  Hz, 1H), 7.03 (m, 1H), 2.21 (s, 3H).  $^{13}C$  NMR (126 MHz, Chloroform-*d*)  $\delta$  158.1, 145.0, 137.1, 135.8, 133.1, 132.7, 131.7, 127.7, 124.0, 121.2, 119.5, 118.2, 19.9. GC-MS (EI)  $m/z$ : 291.

#### 2-(3-methylpyridin-2-yl)phenyl acetate (2h)

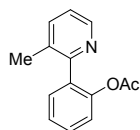

Formula:  $C_{14}H_{13}NO_2$   
Mass: 227

To a mixture of 3-methyl-2-phenylpyridine (84.5 mg, 0.5 mmol) **1h**,  $Ni(acac)_2$  (25.7 mg, 0.1 mmol, 20 mol %), ligand  $MePh_2P$  (20.0 mg, 0.1 mmol, 20 mol %), and  $PhI(OAc)_2$  (483.2 mg, 0.75 mmol, 1.5 equiv) in a reaction tube was added solvent ( $CH_3CN=2.0$  mL). The reaction mixture was stirred at 115 °C for 24 h in air. Following the general procedure, **2h** was purified by column chromatography on silica gel (petroleum ether: ethyl acetate = 5:1) as a white solid (85.1 mg, 75%).  $^1H$  NMR (500 MHz, Chloroform-*d*)  $\delta$  8.72 (d,  $J = 4.8$  Hz, 1H), 7.74 (td,  $J = 7.7, 1.9$  Hz, 1H), 7.35 – 7.25 (m, 3H), 7.18 (d,  $J = 7.7$  Hz, 1H), 6.98 (d,  $J = 8.1$  Hz, 1H), 2.15 (s, 3H), 1.94 (s, 3H).  $^{13}C$  NMR (126 MHz, Chloroform-*d*)  $\delta$  169.5, 155.8, 149.5, 148.4, 138.2, 136.2, 133.5, 128.9, 128.0, 124.8, 122.2, 120.0, 20.6, 19.9. GC-MS (EI)  $m/z$ : 227.

## 2-(pyridin-2-ylmethyl)phenyl acetate (2i)

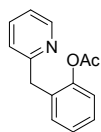

Formula: C<sub>14</sub>H<sub>13</sub>NO<sub>2</sub>  
Mass: 227

To a mixture of 2-benzylpyridine (84.5 mg, 0.5 mmol) **1i**, Ni(acac)<sub>2</sub> (25.7 mg, 0.1 mmol, 20 mol %), ligand MePh<sub>2</sub>P (20.0 mg, 0.1 mmol, 20 mol %), and PhI(OAc)<sub>2</sub> (483.2 mg, 0.75 mmol, 1.5 equiv) in a reaction tube was added solvent (CH<sub>3</sub>CN=2.0 mL). The reaction mixture was stirred at 115 °C for 24 h in air. Following the general procedure, **2i** was purified by column chromatography on silica gel (petroleum ether: ethyl acetate = 5:1) as a white solid (79.5 mg, 70%). <sup>1</sup>H NMR (500 MHz, Chloroform-*d*) δ 8.60 – 8.55 (m, 1H), 7.62 (td, *J* = 7.7, 1.9 Hz, 1H), 7.32 (t, *J* = 7.6 Hz, 2H), 7.24 (td, *J* = 7.4, 1.3 Hz, 1H), 7.18 (dd, *J* = 7.6, 5.1 Hz, 1H), 7.10 (dd, *J* = 15.5, 8.1 Hz, 2H), 4.17 (s, 2H), 2.23 (s, 3H). <sup>13</sup>C NMR (126 MHz, Chloroform-*d*) δ 168.2, 158.7, 148.2, 147.8, 136.0, 130.3, 130.2, 127.0, 125.3, 122.1, 121.7, 120.5, 38.1, 19.9. GC-MS (EI) *m/z*: 227.

## 2-(quinolin-2-yl)phenyl acetate (2j)

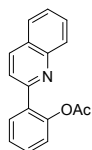

Formula: C<sub>17</sub>H<sub>13</sub>NO<sub>2</sub>  
Mass: 263

To a mixture of 2-phenylquinoline (102.5 mg, 0.5 mmol) **1j**, Ni(acac)<sub>2</sub> (25.7 mg, 0.1 mmol, 20 mol %), ligand MePh<sub>2</sub>P (20.0 mg, 0.1 mmol, 20 mol %), and PhI(OAc)<sub>2</sub> (483.2 mg, 0.75 mmol, 1.5 equiv) in a reaction tube was added solvent (CH<sub>3</sub>CN=2.0 mL). The reaction mixture was stirred at 115 °C for 24 h in air. Following the general procedure, **2j** was purified by column chromatography on silica gel (petroleum ether: ethyl acetate = 5:1) as a white solid (96.0 mg, 73%). <sup>1</sup>H NMR (500 MHz, Chloroform-*d*) δ 8.22 (d, *J* = 8.5 Hz, 1H), 8.17 (d, *J* = 8.5 Hz, 1H), 7.84 (ddd, *J* = 15.1, 7.9, 1.6 Hz, 2H), 7.74 (ddd, *J* = 8.4, 6.8, 1.5 Hz, 1H), 7.66 (d, *J* = 8.5 Hz, 1H), 7.57 (ddd, *J* = 8.1, 6.8, 1.2 Hz, 1H), 7.48 (td, *J* = 7.7, 1.7 Hz, 1H), 7.41 (td, *J* = 7.5, 1.3 Hz, 1H), 7.23 (dd, *J* = 8.0, 1.3 Hz, 1H), 2.17 (s, 3H). <sup>13</sup>C NMR (126 MHz, Chloroform-*d*) δ 169.5, 148.4, 136.4, 132.1, 131.2, 130.1, 127.5, 127.0, 126.7, 126.5, 123.4, 121.6, 100.0, 21.1. GC-MS (EI) *m/z*: 263.

## 2-(1H-pyrazol-1-yl)phenyl acetate (2k)

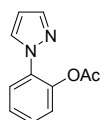

Formula: C<sub>11</sub>H<sub>10</sub>N<sub>2</sub>O<sub>2</sub>  
Mass: 202

To a mixture of 1-phenyl-1H-pyrazole (72.0 mg, 0.5 mmol) **1k**, Ni(acac)<sub>2</sub> (25.7 mg, 0.1 mmol, 20 mol %), ligand MePh<sub>2</sub>P (20.0 mg, 0.1 mmol, 20 mol %), and PhI(OAc)<sub>2</sub> (483.2 mg, 0.75 mmol, 1.5 equiv) in a reaction tube was added solvent (CH<sub>3</sub>CN=2.0 mL). The reaction mixture was stirred at 115 °C for 24 h in air. Following the general

procedure, **2k** was purified by column chromatography on silica gel (petroleum ether: ethyl acetate = 5:1) as a white solid (66.7 mg, 66%). <sup>1</sup>H NMR (500 MHz, Chloroform-*d*) δ 7.83 – 7.74 (m, 2H), 7.65 (dd, *J* = 7.6, 2.2 Hz, 1H), 7.41 (ddd, *J* = 9.7, 7.5, 1.9 Hz, 2H), 7.26 (dd, *J* = 7.7, 1.9 Hz, 1H), 6.48 (t, *J* = 2.3 Hz, 1H), 2.24 (s, 3H). <sup>13</sup>C NMR (126 MHz, Chloroform-*d*) δ 142.4, 140.0, 129.2, 127.6, 127.4, 125.8, 124.7, 123.1, 123.0, 106.0, 19.8. GC-MS (EI) *m/z*: 202.

## 2-(benzo[d]thiazol-2-yl)phenyl acetate (**2l**)

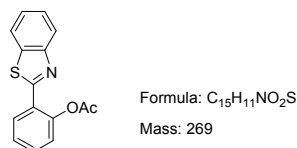

To a mixture of 2-phenylbenzo[d]thiazole (105.5 mg, 0.5 mmol) **1l**, Ni(acac)<sub>2</sub> (25.7 mg, 0.1 mmol, 20 mol %), ligand MePh<sub>2</sub>P (20.0 mg, 0.1 mmol, 20 mol %), and PhI(OAc)<sub>2</sub> (483.2 mg, 0.75 mmol, 1.5 equiv) in a reaction tube was added solvent (CH<sub>3</sub>CN=2.0 mL). The reaction mixture was stirred at 115 °C for 24 h in air. Following the general procedure, **2l** was purified by column chromatography on silica gel (petroleum ether: ethyl acetate = 5:1) as a white solid (95.5 mg, 71%). <sup>1</sup>H NMR (500 MHz, Chloroform-*d*) δ 8.73 (t, *J* = 3.6 Hz, 1H), 7.95 (t, *J* = 2.9 Hz, 1H), 7.83 (dd, *J* = 8.2, 2.9 Hz, 1H), 7.74 (m, 1H), 7.48 (d, *J* = 8.8 Hz, 1H), 7.35 – 7.25 (m, 1H), 7.25 (d, *J* = 3.9 Hz, 1H), 6.90 (dd, *J* = 8.9, 3.1 Hz, 1H), 3.87 (d, *J* = 3.1 Hz, 3H). <sup>13</sup>C NMR (126 MHz, Chloroform-*d*) δ 155.1, 153.5, 148.4, 134.9, 132.7, 131.5, 129.8, 124.1, 121.2, 112.5, 112.2, 54.9. GC-MS (EI) *m/z*: 269.

## quinolin-8-ylmethyl acetate (**2n**)

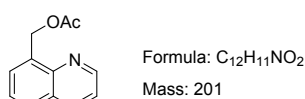

To a mixture of 8-methylquinoline (71.5 mg, 0.5 mmol) **1n**, Ni(acac)<sub>2</sub> (25.7 mg, 0.1 mmol, 20 mol %), ligand MePh<sub>2</sub>P (20.0 mg, 0.1 mmol, 20 mol %), and PhI(OAc)<sub>2</sub> (483.2 mg, 0.75 mmol, 1.5 equiv) in a reaction tube was added solvent (CH<sub>3</sub>CN=2.0 mL). The reaction mixture was stirred at 115 °C for 24 h in air. Following the general procedure, **2n** was purified by column chromatography on silica gel (petroleum ether: ethyl acetate = 5:1) as a white solid (78.4 mg, 78%). <sup>1</sup>H NMR (500 MHz, Chloroform-*d*) δ 8.95 (dd, *J* = 4.3, 1.8 Hz, 1H), 8.16 (dd, *J* = 8.3, 1.8 Hz, 1H), 7.78 (ddd, *J* = 13.6, 7.7, 1.4 Hz, 2H), 7.54 (dd, *J* = 8.2, 7.1 Hz, 1H), 7.43 (dd, *J* = 8.3, 4.2 Hz, 1H), 5.86 (s, 2H), 2.15 (s, 3H). <sup>13</sup>C NMR (126 MHz, Chloroform-*d*) δ 171.0, 149.9, 146.1, 136.3, 134.2, 128.8, 128.2, 128.2, 126.2, 121.3, 62.8, 21.2. GC-MS (EI) *m/z*: 201.

## 2-(2-methoxyphenyl)pyridine (**3a**)



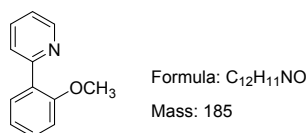

To a mixture of 2-phenylpyridine (77.5 mg, 0.5 mmol) **1a**, Ni(acac)<sub>2</sub> (25.7 mg, 0.1 mmol, 20 mol %), ligand MePh<sub>2</sub>P (20.0 mg, 0.1 mmol, 20 mol %), and additive AgO<sub>2</sub>CCF<sub>3</sub> (165.7 mg, 0.75 mmol, 1.5 equiv) in a reaction tube was added solvent (CH<sub>3</sub>OH=2.0 mL). The reaction mixture was stirred at 115 °C for 24 h in O<sub>2</sub>. Following the general procedure, **3a** was purified by column chromatography on silica gel (petroleum ether: ethyl acetate = 5:1) as a white solid (74.9 mg, 81%). <sup>1</sup>H NMR (500 MHz, Chloroform-*d*) δ 8.75 (d, *J* = 4.9 Hz, 1H), 7.85 (d, *J* = 7.9 Hz, 1H), 7.82 – 7.71 (m, 2H), 7.42 (td, *J* = 8.0, 1.8 Hz, 1H), 7.26 (ddd, *J* = 7.6, 4.9, 1.1 Hz, 1H), 7.12 (t, *J* = 7.5 Hz, 1H), 7.05 (d, *J* = 8.3 Hz, 1H), 3.90 (s, 3H). <sup>13</sup>C NMR (126 MHz, Chloroform-*d*) δ 155.9, 155.0, 148.2, 134.9, 130.2, 129.9, 129.1, 124.2, 120.7, 120.1, 110.5, 54.7. GC-MS (EI) *m/z*: 185.

### 2-(2-methoxy-4-methylphenyl)pyridine (3b)

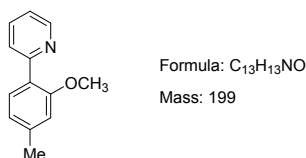

To a mixture of 2-(*p*-tolyl)pyridine (84.5 mg, 0.5 mmol) **1b**, Ni(acac)<sub>2</sub> (25.7 mg, 0.1 mmol, 20 mol %), ligand MePh<sub>2</sub>P (20.0 mg, 0.1 mmol, 20 mol %), and additive AgO<sub>2</sub>CCF<sub>3</sub> (165.7 mg, 0.75 mmol, 1.5 equiv) in a reaction tube was added solvent (CH<sub>3</sub>OH=2.0 mL). The reaction mixture was stirred at 115 °C for 24 h in O<sub>2</sub>. Following the general procedure, **3b** was purified by column chromatography on silica gel (petroleum ether: ethyl acetate = 5:1) as a white solid (69.7 mg, 70%). <sup>1</sup>H NMR (500 MHz, Chloroform-*d*) δ 8.72 (dd, *J* = 5.0, 1.6 Hz, 1H), 7.84 (d, *J* = 7.9 Hz, 1H), 7.76 – 7.66 (m, 2H), 7.26 – 7.16 (m, 1H), 6.96 – 6.90 (m, 1H), 6.85 (s, 1H), 3.88 (s, 3H), 2.44 (s, 3H). <sup>13</sup>C NMR (126 MHz, Chloroform-*d*) δ 155.9, 155.1, 148.2, 139.3, 134.8, 130.0, 125.2, 124.1, 120.8, 120.5, 111.3, 54.6, 20.7. GC-MS (EI) *m/z*: 199.

### 2-(4-bromo-2-methoxyphenyl)pyridine (3c)

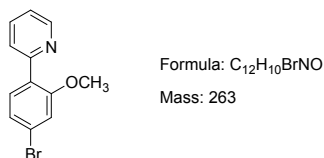

To a mixture of 2-(4-bromophenyl)pyridine (116.5 mg, 0.5 mmol) **1d**, Ni(acac)<sub>2</sub> (25.7 mg, 0.1 mmol, 20 mol %), ligand MePh<sub>2</sub>P (20.0 mg, 0.1 mmol, 20 mol %), and additive AgO<sub>2</sub>CCF<sub>3</sub> (165.7 mg, 0.75 mmol, 1.5 equiv) in a reaction tube was added solvent (CH<sub>3</sub>OH=2.0 mL). The reaction mixture was stirred at 115 °C for 24 h in O<sub>2</sub>. Following the general procedure, **3c** was purified by column chromatography on silica gel (petroleum ether: ethyl acetate = 5:1) as a white solid (111.8 mg, 85%). <sup>1</sup>H NMR (500 MHz, Chloroform-*d*) δ 8.77 – 8.69 (m, 1H), 7.93 – 7.82 (m, 1H), 7.75 (td, *J* = 7.7, 1.9

Hz, 1H), 7.70 (d,  $J = 8.2$  Hz, 1H), 7.29 – 7.23 (m, 2H), 7.18 (d,  $J = 1.8$  Hz, 1H), 3.90 (s, 3H).  $^{13}\text{C}$  NMR (126 MHz, Chloroform- $d$ )  $\delta$  156.5, 148.3, 135.1, 131.3, 130.9, 127.5, 124.1, 123.2, 122.6, 121.1, 114.0, 55.0. GC-MS (EI)  $m/z$ : 263.

### 2-(5-bromo-2-methoxyphenyl)pyridine (3d)

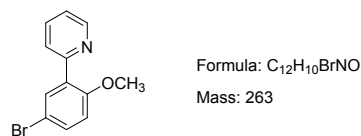

To a mixture of 2-(3-bromophenyl)pyridine (116.5 mg, 0.5 mmol) **1g**,  $\text{Ni}(\text{acac})_2$  (25.7 mg, 0.1 mmol, 20 mol %), ligand  $\text{MePh}_2\text{P}$  (20.0 mg, 0.1 mmol, 20 mol %), and additive  $\text{AgO}_2\text{CCF}_3$  (165.7 mg, 0.75 mmol, 1.5 equiv) in a reaction tube was added solvent ( $\text{CH}_3\text{OH}$ =2.0 mL). The reaction mixture was stirred at 115 °C for 24 h in  $\text{O}_2$ . Following the general procedure, **3d** was purified by column chromatography on silica gel (petroleum ether: ethyl acetate = 5:1) as a white solid (96.0 mg, 73%).  $^1\text{H}$  NMR (500 MHz, Chloroform- $d$ )  $\delta$  8.35 (dd,  $J = 7.9, 1.7$  Hz, 1H), 8.13 (d,  $J = 8.4$  Hz, 1H), 7.97 (d,  $J = 8.1$  Hz, 1H), 7.55 – 7.52 (m, 2H), 7.45 (d,  $J = 1.2$  Hz, 1H), 7.30 (s, 1H), 2.52 (s, 3H).  $^{13}\text{C}$  NMR (126 MHz, Chloroform- $d$ )  $\delta$  151.9, 148.5, 134.3, 130.5, 129.4, 126.7, 125.4, 124.4, 122.8, 122.4, 120.4, 20.7. GC-MS (EI)  $m/z$ : 263.

### 2-(2-methoxyphenyl)-3-methylpyridine (3e)

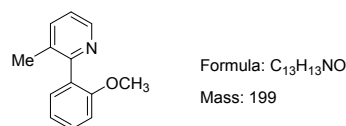

To a mixture of 3-methyl-2-phenylpyridine (84.5 mg, 0.5 mmol) **1h**,  $\text{Ni}(\text{acac})_2$  (25.7 mg, 0.1 mmol, 20 mol %), ligand  $\text{MePh}_2\text{P}$  (20.0 mg, 0.1 mmol, 20 mol %), and additive  $\text{AgO}_2\text{CCF}_3$  (165.7 mg, 0.75 mmol, 1.5 equiv) in a reaction tube was added solvent ( $\text{CH}_3\text{OH}$ =2.0 mL). The reaction mixture was stirred at 115 °C for 24 h in  $\text{O}_2$ . Following the general procedure, **3e** was purified by column chromatography on silica gel (petroleum ether: ethyl acetate = 5:1) as a white solid (77.6 mg, 78%).  $^1\text{H}$  NMR (500 MHz, Chloroform- $d$ )  $\delta$  8.56 (d,  $J = 5.2$  Hz, 1H), 7.60 (d,  $J = 7.9$  Hz, 1H), 7.46 – 7.38 (m, 1H), 7.33 – 7.29 (m, 1H), 7.23 (td,  $J = 5.0, 2.4$  Hz, 1H), 7.09 (t,  $J = 7.5$  Hz, 1H), 7.01 (d,  $J = 8.2$  Hz, 1H), 3.80 (s, 3H), 2.20 (s, 3H).  $^{13}\text{C}$  NMR (126 MHz, Chloroform- $d$ )  $\delta$  155.8, 155.6, 145.9, 145.4, 136.6, 131.9, 129.5, 128.6, 121.3, 119.8, 109.9, 54.5, 18.0. GC-MS (EI)  $m/z$ : 199.

### 2-(2-methoxyphenyl)quinoline (3f)

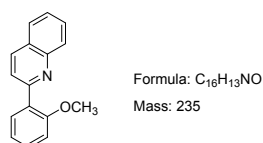

To a mixture of 2-phenylquinoline (102.5 mg, 0.5 mmol) **1j**,  $\text{Ni}(\text{acac})_2$  (25.7 mg, 0.1

mmol, 20 mol %), ligand MePh<sub>2</sub>P (20.0 mg, 0.1 mmol, 20 mol %), and additive AgO<sub>2</sub>CCF<sub>3</sub> (165.7 mg, 0.75 mmol, 1.5 equiv) in a reaction tube was added solvent (CH<sub>3</sub>OH=2.0 mL). The reaction mixture was stirred at 115 °C for 24 h in O<sub>2</sub>. Following the general procedure, **3f** was purified by column chromatography on silica gel (petroleum ether: ethyl acetate = 5:1) as a white solid (76.4 mg, 65%). <sup>1</sup>H NMR (500 MHz, Chloroform-*d*) δ 8.20 (d, *J* = 8.5 Hz, 1H), 8.16 (d, *J* = 8.6 Hz, 1H), 7.89 (d, *J* = 8.5 Hz, 1H), 7.85 (td, *J* = 8.9, 8.2, 1.6 Hz, 2H), 7.71 (ddd, *J* = 8.4, 6.8, 1.5 Hz, 1H), 7.54 (ddd, *J* = 8.1, 6.8, 1.2 Hz, 1H), 7.43 (ddd, *J* = 8.9, 7.5, 1.8 Hz, 1H), 7.14 (td, *J* = 7.4, 1.0 Hz, 1H), 7.04 (dd, *J* = 8.3, 0.9 Hz, 1H), 3.87 (s, 3H). <sup>13</sup>C NMR (126 MHz, Chloroform-*d*) δ 157.2, 157.1, 135.3, 131.5, 130.4, 129.6, 129.3, 127.4, 127.1, 126.3, 123.5, 121.3, 111.5, 55.7. GC-MS (EI) *m/z*: 235.

### 1-(2-methoxyphenyl)-1H-pyrazole (3g)

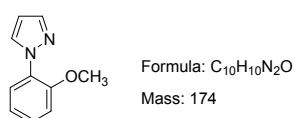

To a mixture of 1-phenyl-1H-pyrazole (72.0 mg, 0.5 mmol) **1k**, Ni(acac)<sub>2</sub> (25.7 mg, 0.1 mmol, 20 mol %), ligand MePh<sub>2</sub>P (20.0 mg, 0.1 mmol, 20 mol %), and additive AgO<sub>2</sub>CCF<sub>3</sub> (165.7 mg, 0.75 mmol, 1.5 equiv) in a reaction tube was added solvent (CH<sub>3</sub>OH=2.0 mL). The reaction mixture was stirred at 115 °C for 24 h in O<sub>2</sub>. Following the general procedure, **3g** was purified by column chromatography on silica gel (petroleum ether: ethyl acetate = 5:1) as a white solid (68.7 mg, 79%). <sup>1</sup>H NMR (500 MHz, Chloroform-*d*) δ 7.77 (dd, *J* = 10.8, 2.1 Hz, 2H), 7.65 (dd, *J* = 7.6, 1.9 Hz, 1H), 7.45 – 7.36 (m, 2H), 7.26 (dd, *J* = 7.7, 1.8 Hz, 1H), 6.48 (t, *J* = 2.2 Hz, 1H), 2.24 (s, 3H). <sup>13</sup>C NMR (126 MHz, Chloroform-*d*) δ 167.8, 142.4, 140.0, 129.2, 127.4, 125.8, 124.7, 123.0, 106.0, 19.8. GC-MS (EI) *m/z*: 174.

### 8-(methoxymethyl)quinoline (3j)

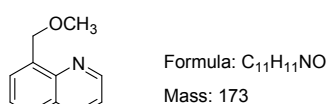

To a mixture of 8-methylquinoline (71.5 mg, 0.5 mmol) **1n**, Ni(acac)<sub>2</sub> (25.7 mg, 0.1 mmol, 20 mol %), ligand MePh<sub>2</sub>P (20.0 mg, 0.1 mmol, 20 mol %), and additive AgO<sub>2</sub>CCF<sub>3</sub> (165.7 mg, 0.75 mmol, 1.5 equiv) in a reaction tube was added solvent (CH<sub>3</sub>OH=2.0 mL). The reaction mixture was stirred at 115 °C for 24 h in O<sub>2</sub>. Following the general procedure, **3j** was purified by column chromatography on silica gel (petroleum ether: ethyl acetate = 5:1) as a white solid (74.4 mg, 86%). <sup>1</sup>H NMR (500 MHz, Chloroform-*d*) δ 8.92 (dd, *J* = 4.3, 1.8 Hz, 1H), 8.14 (dd, *J* = 8.2, 1.9 Hz, 1H), 7.82 (d, *J* = 7.2 Hz, 1H), 7.77 – 7.69 (m, 1H), 7.54 (t, *J* = 7.6 Hz, 1H), 7.39 (dd, *J* = 8.3, 4.2 Hz, 1H), 5.20 (s, 2H), 3.57 (s, 3H). <sup>13</sup>C NMR (126 MHz, Chloroform-*d*) δ 149.6, 145.9, 136.5, 136.3, 128.1, 127.5, 127.2, 126.4, 121.0, 70.8, 58.9. GC-MS (EI) *m/z*: 173.

### 2-(2-ethoxyphenyl)pyridine (3k)

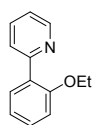

Formula:  $C_{13}H_{13}NO$   
Mass: 199

To a mixture of 2-phenylpyridine (77.5 mg, 0.5 mmol) **1a**,  $Ni(acac)_2$  (25.7 mg, 0.1 mmol, 20 mol %), ligand  $MePh_2P$  (20.0 mg, 0.1 mmol, 20 mol %), and additive  $AgO_2CCF_3$  (165.7 mg, 0.75 mmol, 1.5 equiv) in a reaction tube was added solvent ( $CH_3CH_2OH=2.0$  mL). The reaction mixture was stirred at 115 °C for 24 h in  $O_2$ . Following the general procedure, **3k** was purified by column chromatography on silica gel (petroleum ether: ethyl acetate = 5:1) as a white solid (76.6 mg, 77%).  $^1H$  NMR (500 MHz, Chloroform-*d*)  $\delta$  8.74 (d,  $J = 4.9$  Hz, 1H), 7.94 (d,  $J = 8.1$  Hz, 1H), 7.84 (dt,  $J = 8.1, 2.5$  Hz, 1H), 7.74 (t,  $J = 7.7$  Hz, 1H), 7.38 (t,  $J = 7.8$  Hz, 1H), 7.28 – 7.18 (m, 1H), 7.11 (t,  $J = 7.1$  Hz, 1H), 7.02 (d,  $J = 8.1$  Hz, 1H), 4.13 (dd,  $J = 7.0, 3.0$  Hz, 2H), 1.42 (t,  $J = 6.9$  Hz, 3H).  $^{13}C$  NMR (126 MHz, Chloroform-*d*)  $\delta$  155.4, 155.0, 148.2, 134.7, 130.2, 129.0, 128.0, 124.3, 120.6, 120.1, 111.7, 63.2, 13.8. GC-MS (EI)  $m/z$ : 199.

### 2-(2-isopropoxyphenyl)pyridine (3l)

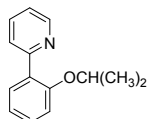

Formula:  $C_{14}H_{15}NO$   
Mass: 213

To a mixture of 2-phenylpyridine (77.5 mg, 0.5 mmol) **1a**,  $Ni(acac)_2$  (25.7 mg, 0.1 mmol, 20 mol %), ligand  $MePh_2P$  (20.0 mg, 0.1 mmol, 20 mol %), and additive  $AgO_2CCF_3$  (165.7 mg, 0.75 mmol, 1.5 equiv) in a reaction tube was added solvent [ $(CH_3)_2CHOH=2.0$  mL]. The reaction mixture was stirred at 115 °C for 24 h in  $O_2$ . Following the general procedure, **3l** was purified by column chromatography on silica gel (petroleum ether: ethyl acetate = 5:1) as a white solid (79.9 mg, 75%).  $^1H$  NMR (500 MHz, Chloroform-*d*)  $\delta$  8.74 (d,  $J = 4.3$  Hz, 1H), 7.95 (d,  $J = 8.0$  Hz, 1H), 7.85 (d,  $J = 7.5$  Hz, 1H), 7.75 (t,  $J = 7.6$  Hz, 1H), 7.37 (t,  $J = 7.6$  Hz, 1H), 7.28 – 7.22 (m, 1H), 7.11 (t,  $J = 7.5$  Hz, 1H), 7.04 (d,  $J = 8.3$  Hz, 1H), 4.56 (hept,  $J = 6.0$  Hz, 1H), 1.33 (d,  $J = 6.0$  Hz, 6H).  $^{13}C$  NMR (126 MHz, Chloroform-*d*)  $\delta$  155.0, 154.3, 147.9, 134.8, 130.4, 129.0, 124.6, 124.5, 120.6, 120.2, 113.9, 70.2, 21.1. GC-MS (EI)  $m/z$ : 213.

### 2-(pyridin-2-yl)phenyl benzoate (4a)

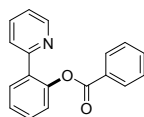

Formula:  $C_{18}H_{13}NO_2$   
Mass: 275

To a mixture of 2-phenylpyridine (77.5 mg, 0.5 mmol) **1a**,  $Ni(acac)_2$  (25.7 mg, 0.1 mmol, 20 mol %), ligand  $MePh_2P$  (20.0 mg, 0.1 mmol, 20 mol %), and  $PhCOOH$  (91.6 mg, 0.75 mmol, 1.5 equiv) in a reaction tube was added solvent (NMP=2.0 mL). The reaction mixture was stirred at 130 °C for 24 h in  $O_2$ . Following the general procedure, **4a** was purified by column chromatography on silica gel (petroleum ether: ethyl acetate = 5:1) as a white solid (93.5 mg, 68%).  $^1H$  NMR (500 MHz, Chloroform-*d*)  $\delta$  8.66 (d,  $J = 4.4$  Hz, 1H), 8.10 (d,  $J = 6.9$  Hz, 2H), 7.82 (dd,  $J = 7.6, 1.8$  Hz, 1H), 7.72 (t,  $J = 7.7$  Hz, 1H), 7.65 – 7.58 (m, 2H), 7.52 (td,  $J = 7.7, 1.7$  Hz, 1H), 7.49 – 7.41 (m, 3H), 7.33 (dd,  $J = 8.1, 1.3$  Hz, 1H), 7.25 (d,  $J = 5.1$  Hz, 1H).  $^{13}C$  NMR (126 MHz, Chloroform-*d*)

$\delta$  171.3, 149.1, 148.3, 136.8, 133.6, 133.5, 131.0, 130.2, 130.2, 130.0, 128.5, 128.5, 126.5, 124.1, 123.4, 122.4. GC-MS (EI)  $m/z$ : 275.

### 5-bromo-2-(pyridin-2-yl)phenyl benzoate (4b)

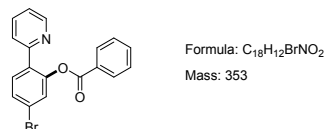

To a mixture of 2-(4-bromophenyl)pyridine (116.5 mg, 0.5 mmol) **1d**,  $Ni(acac)_2$  (25.7 mg, 0.1 mmol, 20 mol %), ligand  $MePh_2P$  (20.0 mg, 0.1 mmol, 20 mol %), and  $PhCOOH$  (91.6 mg, 0.75 mmol, 1.5 equiv) in a reaction tube was added solvent (NMP=2.0 mL). The reaction mixture was stirred at 130 °C for 24 h in  $O_2$ . Following the general procedure, **4b** was purified by column chromatography on silica gel (petroleum ether: ethyl acetate = 5:1) as a white solid (111.2 mg, 63%).  $^1H$  NMR (500 MHz, Chloroform- $d$ )  $\delta$  8.58 (s, 1H), 8.12 (d,  $J$  = 7.7 Hz, 1H), 7.92 (d,  $J$  = 7.8 Hz, 2H), 7.61 (t,  $J$  = 7.7 Hz, 1H), 7.57 (t,  $J$  = 7.4 Hz, 1H), 7.53 – 7.51 (m, 1H), 7.48 (t,  $J$  = 7.7 Hz, 1H), 7.45 – 7.35 (m, 3H), 7.24 – 7.09 (m, 1H).  $^{13}C$  NMR (126 MHz, Chloroform- $d$ )  $\delta$  170.8, 164.3, 149.7, 133.8, 133.6, 133.6, 130.2, 129.5, 128.9, 128.5, 128.5, 128.4, 127.2, 125.5, 124.3, 123.0. GC-MS (EI)  $m/z$ : 353.

### 2-(pyridin-2-yl)phenyl 4-methoxybenzoate (4c)

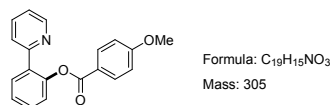

To a mixture of 2-phenylpyridine (77.5 mg, 0.5 mmol) **1a**,  $Ni(acac)_2$  (25.7 mg, 0.1 mmol, 20 mol %), ligand  $MePh_2P$  (20.0 mg, 0.1 mmol, 20 mol %), and 4-methoxybenzoic acid (76.0 mg, 0.75 mmol, 1.5 equiv) in a reaction tube was added solvent (NMP=2.0 mL). The reaction mixture was stirred at 130 °C for 24 h in  $O_2$ . Following the general procedure, **4c** was purified by column chromatography on silica gel (petroleum ether: ethyl acetate = 5:1) as a white solid (101.0 mg, 66%).  $^1H$  NMR (500 MHz, Chloroform- $d$ )  $\delta$  8.68 (d,  $J$  = 4.8 Hz, 1H), 8.06 (d,  $J$  = 1.1 Hz, 2H), 7.79 (dd,  $J$  = 7.7, 1.7 Hz, 1H), 7.68 (td,  $J$  = 7.8, 1.8 Hz, 1H), 7.59 (d,  $J$  = 8.0 Hz, 1H), 7.49 (td,  $J$  = 7.8, 1.7 Hz, 1H), 7.41 (td,  $J$  = 7.6, 1.2 Hz, 1H), 7.31 (dd,  $J$  = 8.1, 1.2 Hz, 1H), 7.23 (t,  $J$  = 6.2 Hz, 1H), 6.94 (m, 2H), 3.88 (s, 3H).  $^{13}C$  NMR (126 MHz, Chloroform- $d$ )  $\delta$  171.1, 164.8, 164.0, 163.9, 149.0, 148.4, 132.4, 132.3, 131.0, 130.1, 126.3, 123.5, 122.4, 121.9, 113.8, 113.7, 55.5. GC-MS (EI)  $m/z$ : 305.

### 2-(pyridin-2-yl)phenyl 4-butylbenzoate (4d)

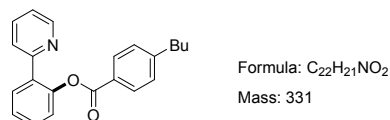

To a mixture of 2-phenylpyridine (77.5 mg, 0.5 mmol) **1a**,  $Ni(acac)_2$  (25.7 mg, 0.1 mmol, 20 mol %), ligand  $MePh_2P$  (20.0 mg, 0.1 mmol, 20 mol %), and 4-butylbenzoic

acid (80.1 mg, 0.75 mmol, 1.5 equiv) in a reaction tube was added solvent (NMP=2.0 mL). The reaction mixture was stirred at 130 °C for 24 h in O<sub>2</sub>. Following the general procedure, **4d** was purified by column chromatography on silica gel (petroleum ether: ethyl acetate = 5:1) as a white solid (110.9 mg, 67%). <sup>1</sup>H NMR (500 MHz, Chloroform-*d*) δ 8.69 (d, *J* = 4.9 Hz, 1H), 8.03 (d, *J* = 3.0 Hz, 2H), 7.80 (dd, *J* = 7.7, 1.8 Hz, 1H), 7.67 (td, *J* = 7.7, 1.8 Hz, 1H), 7.59 (d, *J* = 7.9 Hz, 1H), 7.48 (d, *J* = 2.1 Hz, 3H), 7.41 (td, *J* = 7.6, 1.3 Hz, 1H), 7.30 (dd, *J* = 8.0, 1.3 Hz, 1H), 7.24 – 7.19 (m, 1H), 1.35 (s, 9H). <sup>13</sup>C NMR (126 MHz, Chloroform-*d*) δ 171.3, 165.1, 157.3, 149.3, 148.3, 136.6, 131.0, 130.1, 129.9, 126.4, 125.5, 125.5, 124.1, 123.4, 122.3, 35.2, 31.1. GC-MS (EI) *m/z*: 331.

## 2-(pyridin-2-yl)phenyl 4-chlorobenzoate (**4e**)

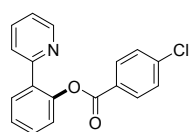

Formula: C<sub>18</sub>H<sub>12</sub>ClNO<sub>2</sub>  
Mass: 309

To a mixture of 2-phenylpyridine (77.5 mg, 0.5 mmol) **1a**, Ni(acac)<sub>2</sub> (25.7 mg, 0.1 mmol, 20 mol %), ligand MePh<sub>2</sub>P (20.0 mg, 0.1 mmol, 20 mol %), and 4-chlorobenzoic acid (117.0 mg, 0.75 mmol, 1.5 equiv) in a reaction tube was added solvent (NMP=2.0 mL). The reaction mixture was stirred at 130 °C for 24 h in O<sub>2</sub>. Following the general procedure, **4e** was purified by column chromatography on silica gel (petroleum ether: ethyl acetate = 5:1) as a white solid (89.6 mg, 58%). <sup>1</sup>H NMR (500 MHz, Chloroform-*d*) δ 8.63 – 8.57 (m, 1H), 8.03 (d, *J* = 8.5 Hz, 2H), 7.77 (dd, *J* = 7.6, 1.8 Hz, 1H), 7.72 – 7.67 (m, 1H), 7.56 (d, *J* = 7.9 Hz, 1H), 7.51 (td, *J* = 7.7, 1.8 Hz, 1H), 7.46 – 7.40 (m, 3H), 7.31 (dd, *J* = 8.0, 1.3 Hz, 1H), 7.22 (t, *J* = 6.3 Hz, 1H). <sup>13</sup>C NMR (126 MHz, Chloroform-*d*) δ 164.3, 157.3, 156.7, 148.1, 140.1, 131.6, 131.5, 131.0, 130.1, 128.9, 127.9, 126.6, 123.9, 123.3, 122.4, 113.9. GC-MS (EI) *m/z*: 309.

## 2-(pyridin-2-yl)phenyl 3-iodobenzoate (**4f**)

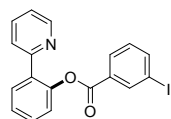

Formula: C<sub>18</sub>H<sub>12</sub>INO<sub>2</sub>  
Mass: 401

To a mixture of 2-phenylpyridine (77.5 mg, 0.5 mmol) **1a**, Ni(acac)<sub>2</sub> (25.7 mg, 0.1 mmol, 20 mol %), ligand MePh<sub>2</sub>P (20.0 mg, 0.1 mmol, 20 mol %), and 3-iodobenzoic acid (185.9 mg, 0.75 mmol, 1.5 equiv) in a reaction tube was added solvent (NMP=2.0 mL). The reaction mixture was stirred at 130 °C for 24 h in O<sub>2</sub>. Following the general procedure, **4f** was purified by column chromatography on silica gel (petroleum ether: ethyl acetate = 5:1) as a white solid (120.3 mg, 60%). <sup>1</sup>H NMR (500 MHz, Chloroform-*d*) δ 8.63 (s, 1H), 8.24 (t, *J* = 1.7 Hz, 1H), 7.94 (d, *J* = 7.8 Hz, 2H), 7.89 (dt, *J* = 7.9, 1.4 Hz, 2H), 7.78 – 7.70 (m, 1H), 7.60 (t, *J* = 8.3 Hz, 1H), 7.46 (d, *J* = 7.7 Hz, 1H), 7.35 (d, *J* = 8.2 Hz, 1H), 7.16 (t, *J* = 7.9 Hz, 2H). <sup>13</sup>C NMR (126 MHz, Chloroform-*d*) δ 163.1, 160.0, 159.6, 152.1, 149.2, 142.5, 138.9, 132.4, 130.7, 130.2, 129.3, 127.7, 125.7, 123.2, 120.8, 116.5, 102.6, 93.8. GC-MS (EI) *m/z*: 401.

## 2-(pyridin-2-yl)phenyl 2-iodobenzoate (**4g**)

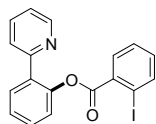

Formula: C<sub>18</sub>H<sub>12</sub>INO<sub>2</sub>

Mass: 401

To a mixture of 2-phenylpyridine (77.5 mg, 0.5 mmol) **1a**, Ni(acac)<sub>2</sub> (25.7 mg, 0.1 mmol, 20 mol %), ligand MePh<sub>2</sub>P (20.0 mg, 0.1 mmol, 20 mol %), and 2-iodobenzoic acid (185.9 mg, 0.75 mmol, 1.5 equiv) in a reaction tube was added solvent (NMP=2.0 mL). The reaction mixture was stirred at 130 °C for 24 h in O<sub>2</sub>. Following the general procedure, **4g** was purified by column chromatography on silica gel (petroleum ether: ethyl acetate = 5:1) as a white solid (110.3 mg, 55%). <sup>1</sup>H NMR (500 MHz, Chloroform-*d*) δ 8.75 – 8.66 (m, 1H), 8.51 (d, *J* = 5.0 Hz, 1H), 8.03 – 7.93 (m, 2H), 7.91 – 7.82 (m, 1H), 7.76 (dd, *J* = 13.8, 7.5 Hz, 2H), 7.48 (d, *J* = 7.5 Hz, 1H), 7.44 (d, *J* = 7.3 Hz, 1H), 7.31 (d, *J* = 7.5 Hz, 1H), 7.04 (d, *J* = 8.5 Hz, 1H), 6.91 (d, *J* = 7.6 Hz, 1H). <sup>13</sup>C NMR (126 MHz, Chloroform-*d*) δ 160.0, 157.9, 157.4, 149.4, 145.9, 139.1, 137.8, 137.1, 131.5, 129.1, 128.8, 127.0, 126.1, 122.2, 121.5, 120.7, 119.1, 118.7. GC-MS (EI) *m/z*: 401.

## 4. NMR spectra

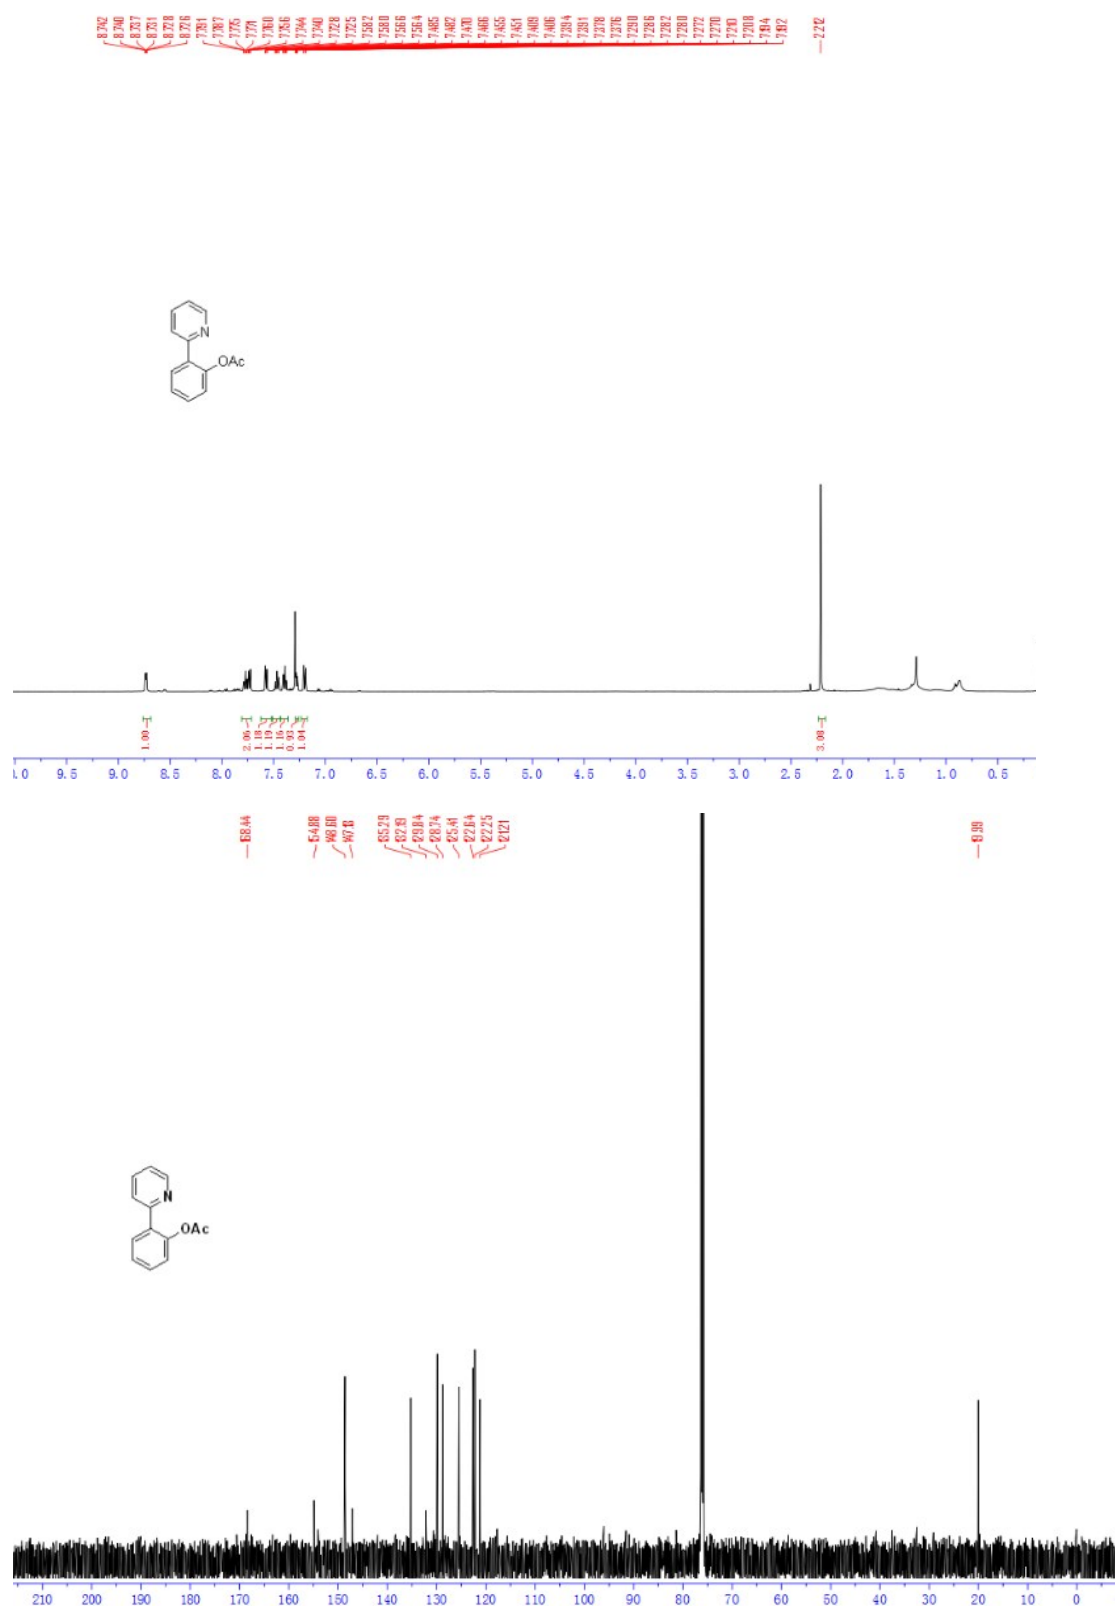



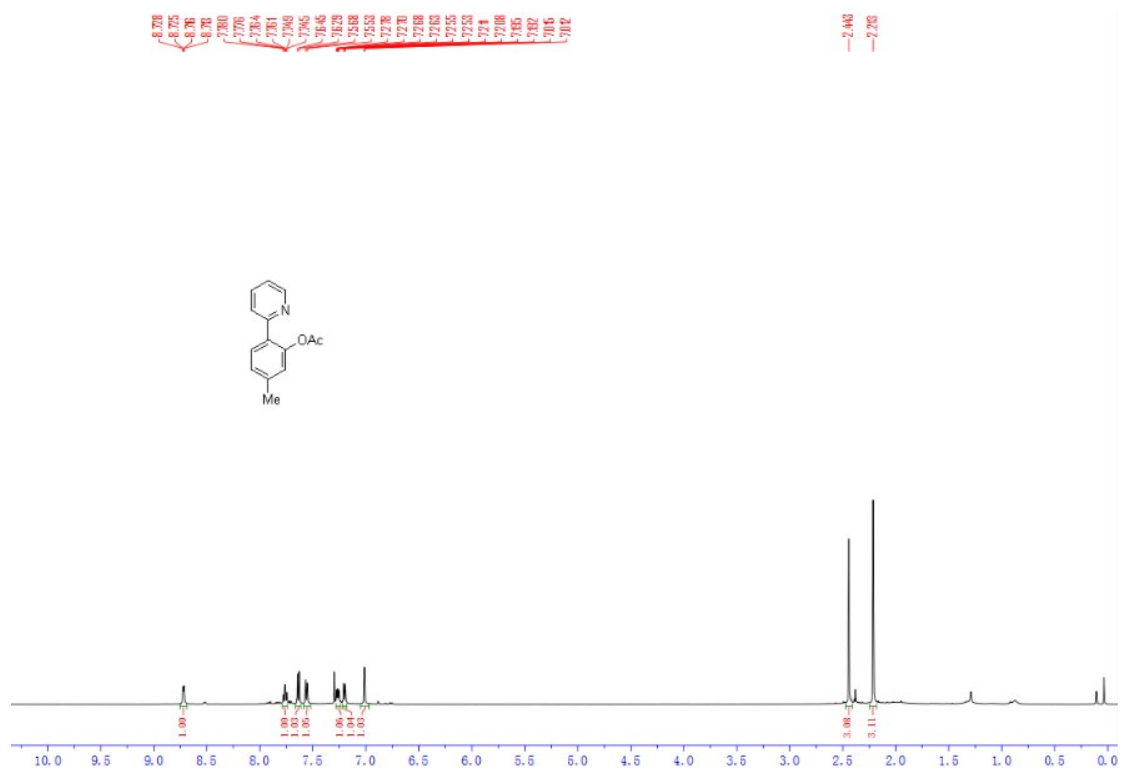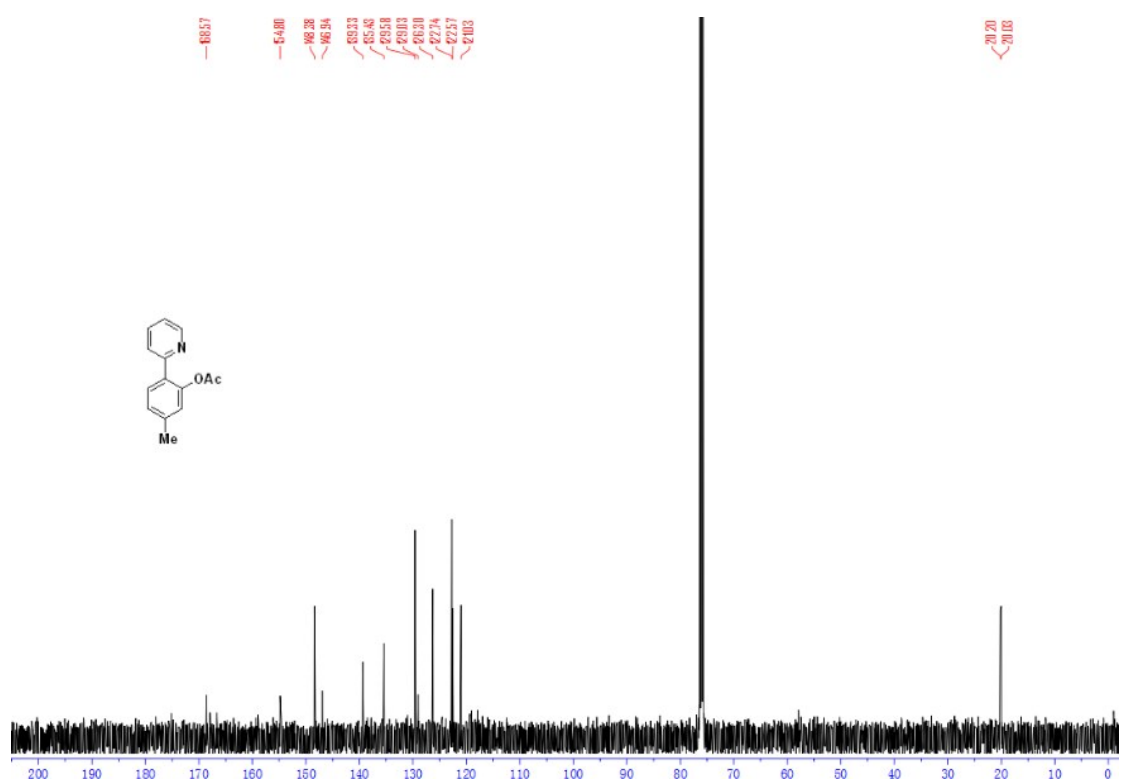

8.540  
8.537  
8.528  
7.855  
7.852  
7.888  
7.753  
7.797  
7.739  
7.730  
7.755  
7.752  
7.678  
7.667  
7.663  
6.972  
6.883

-7.271

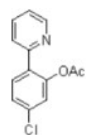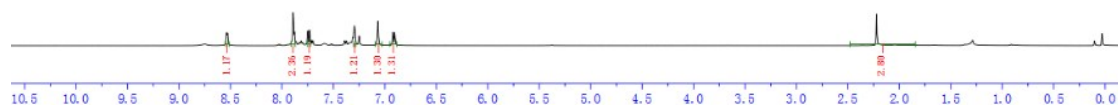

65.88  
65.83  
94.83  
68.93  
65.76  
60.03  
42.81  
40.81  
40.13  
47.64  
46.41

-8.82

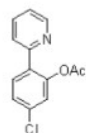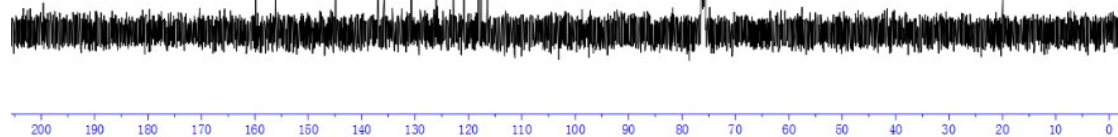

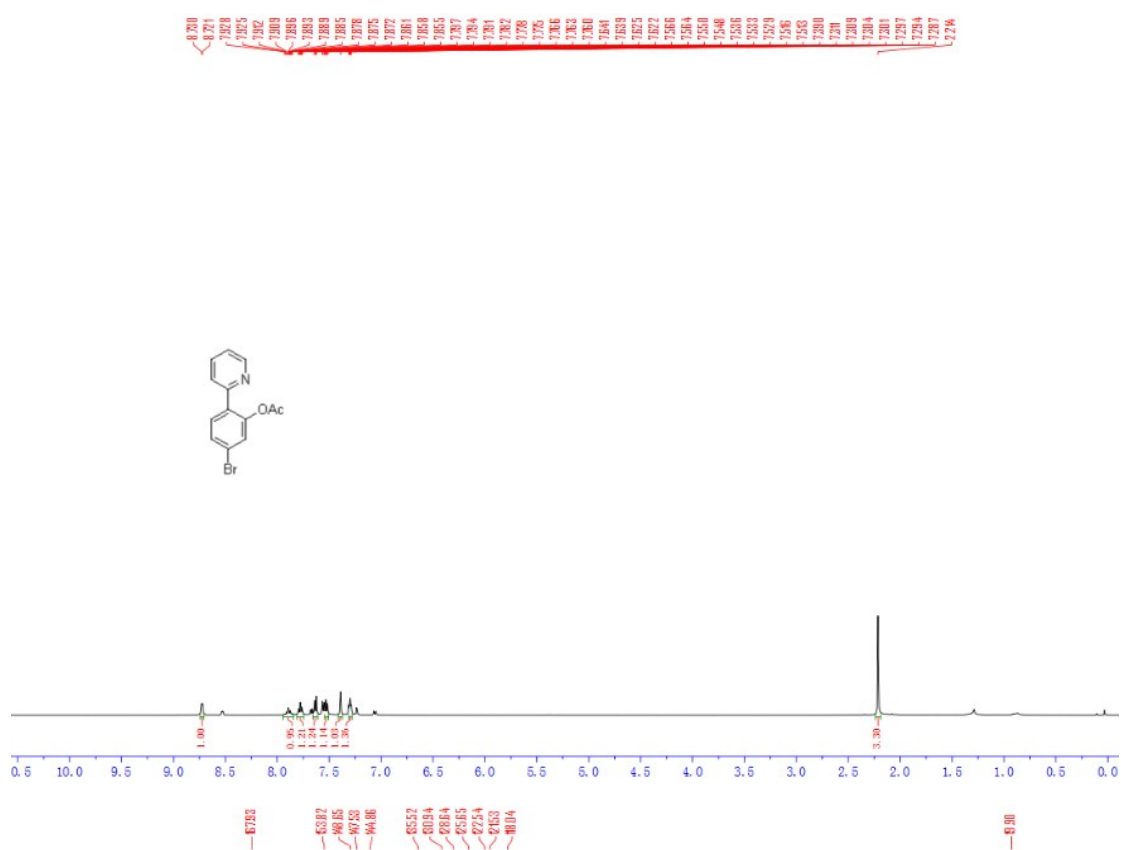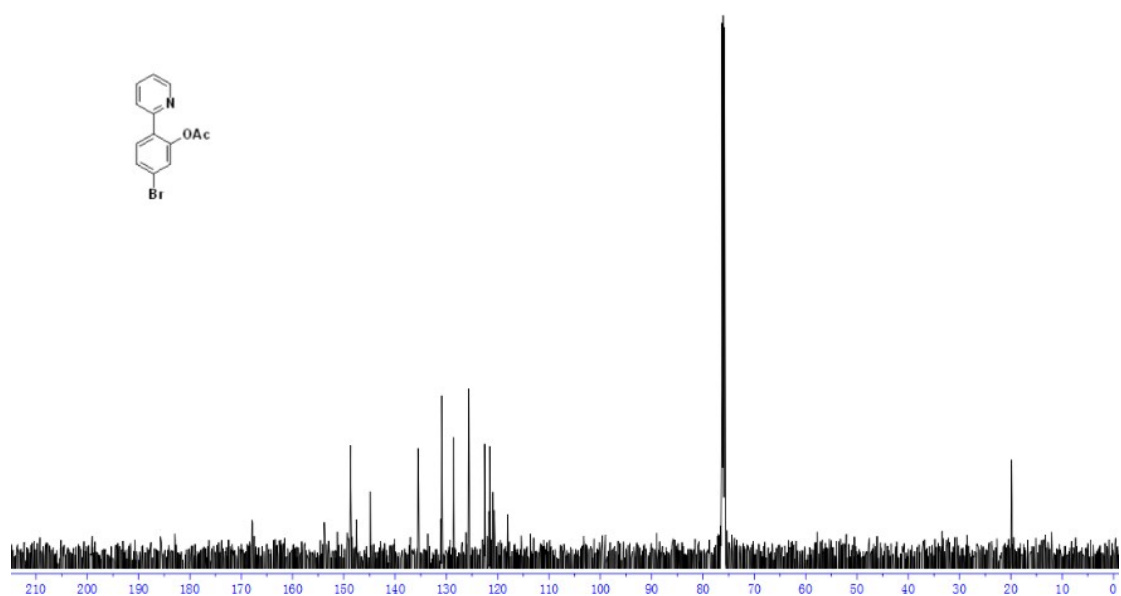

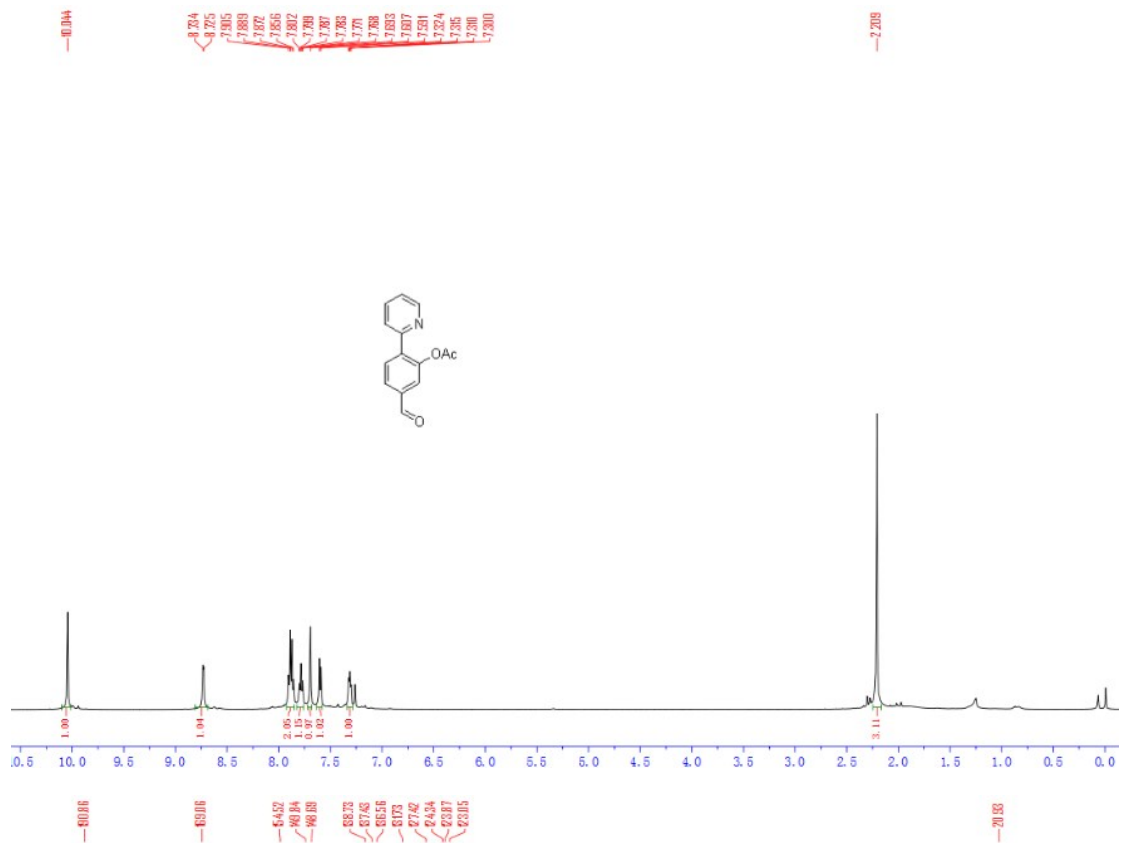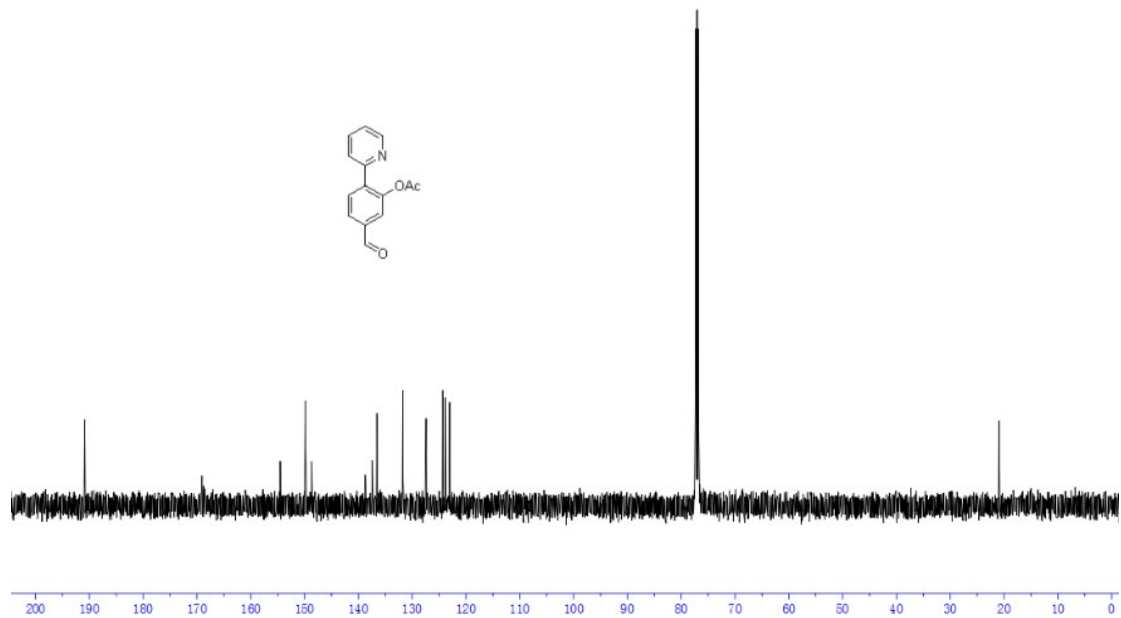

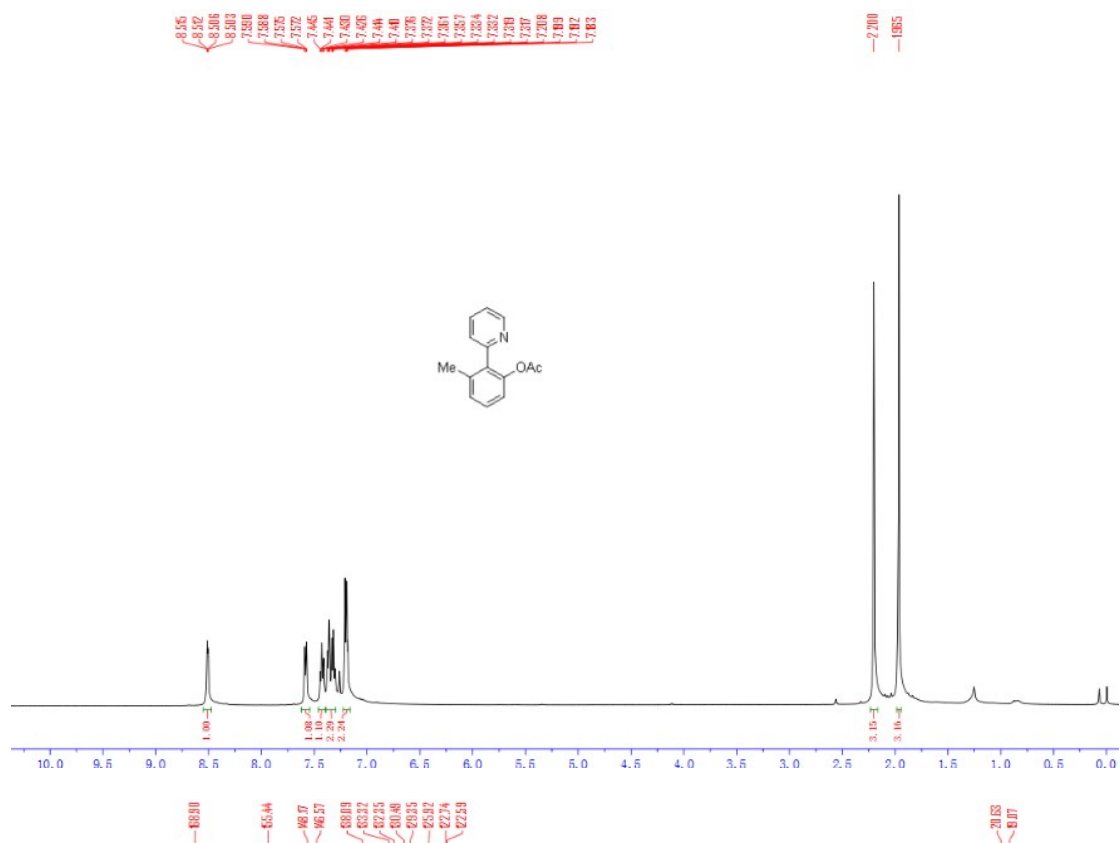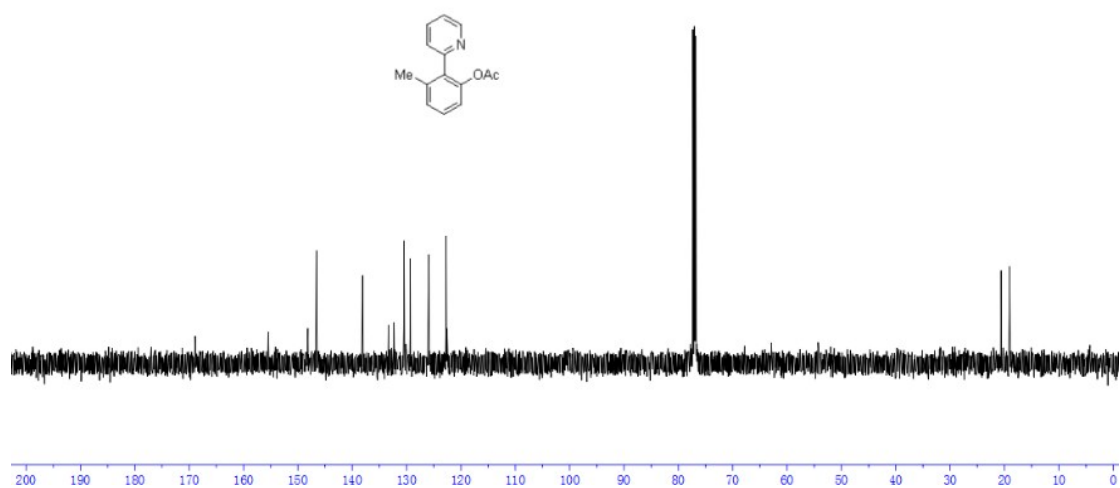

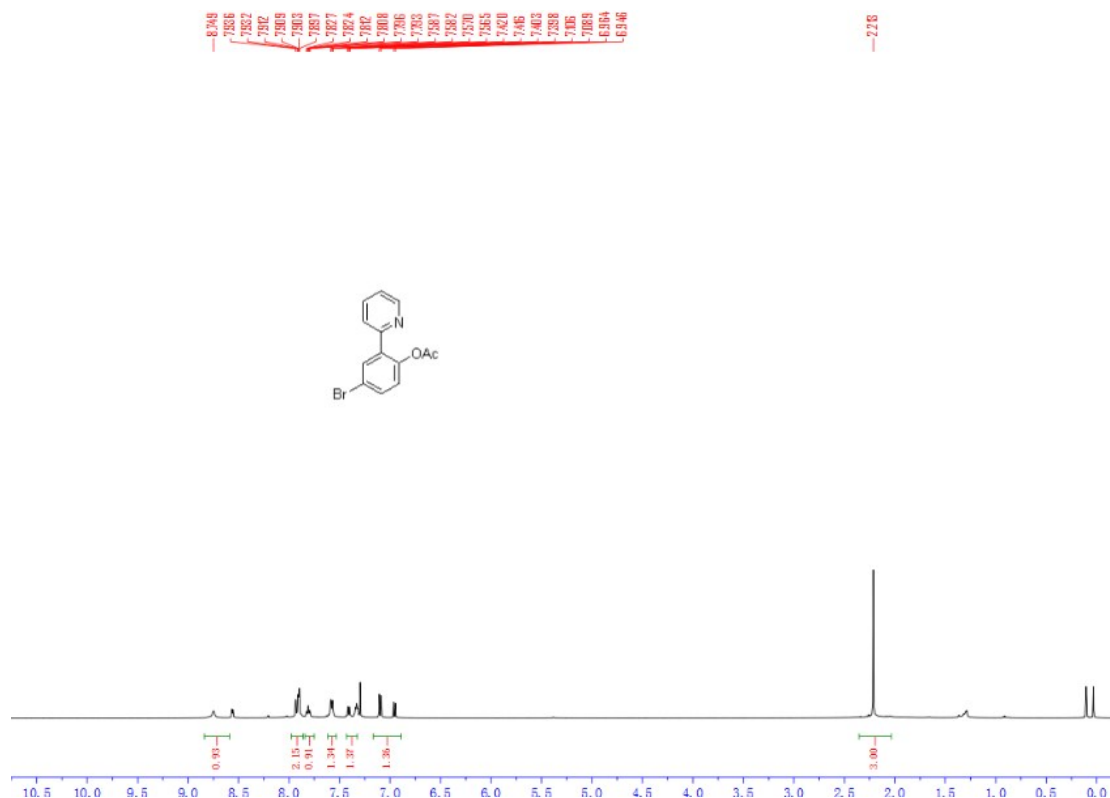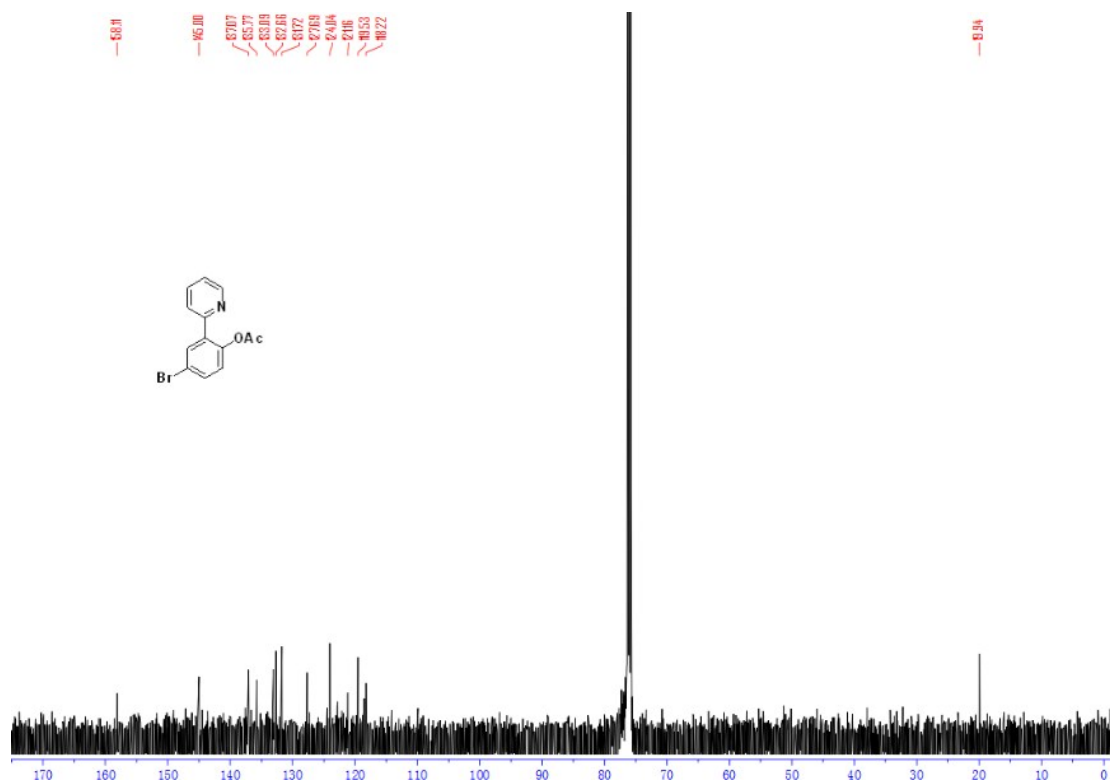

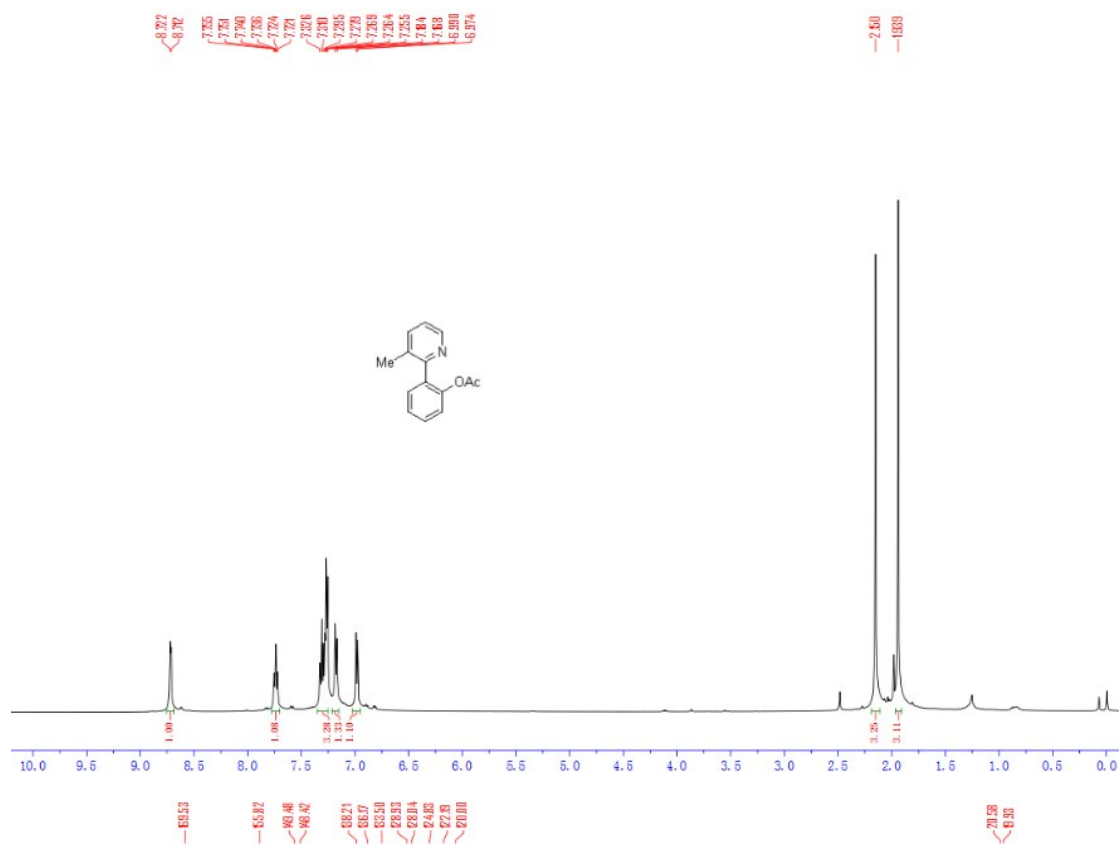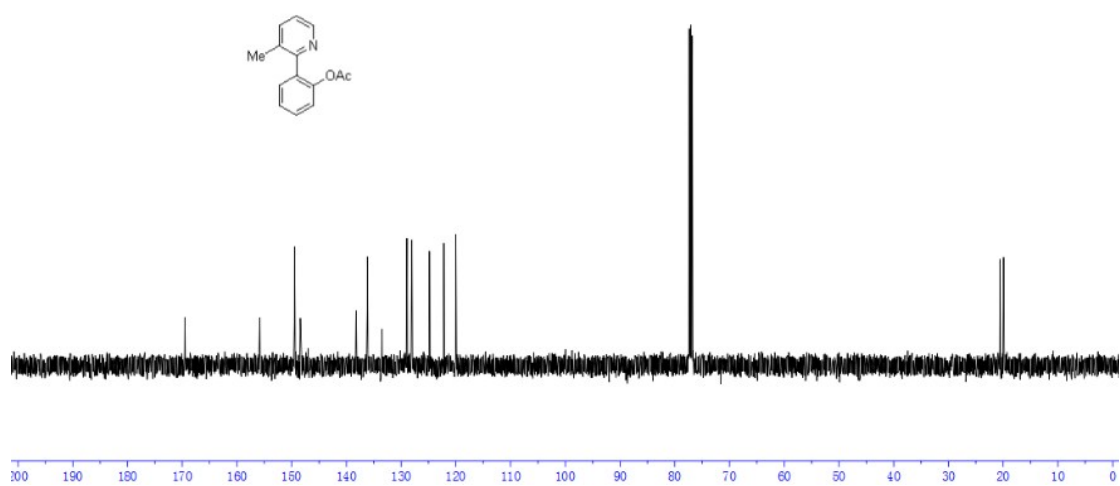

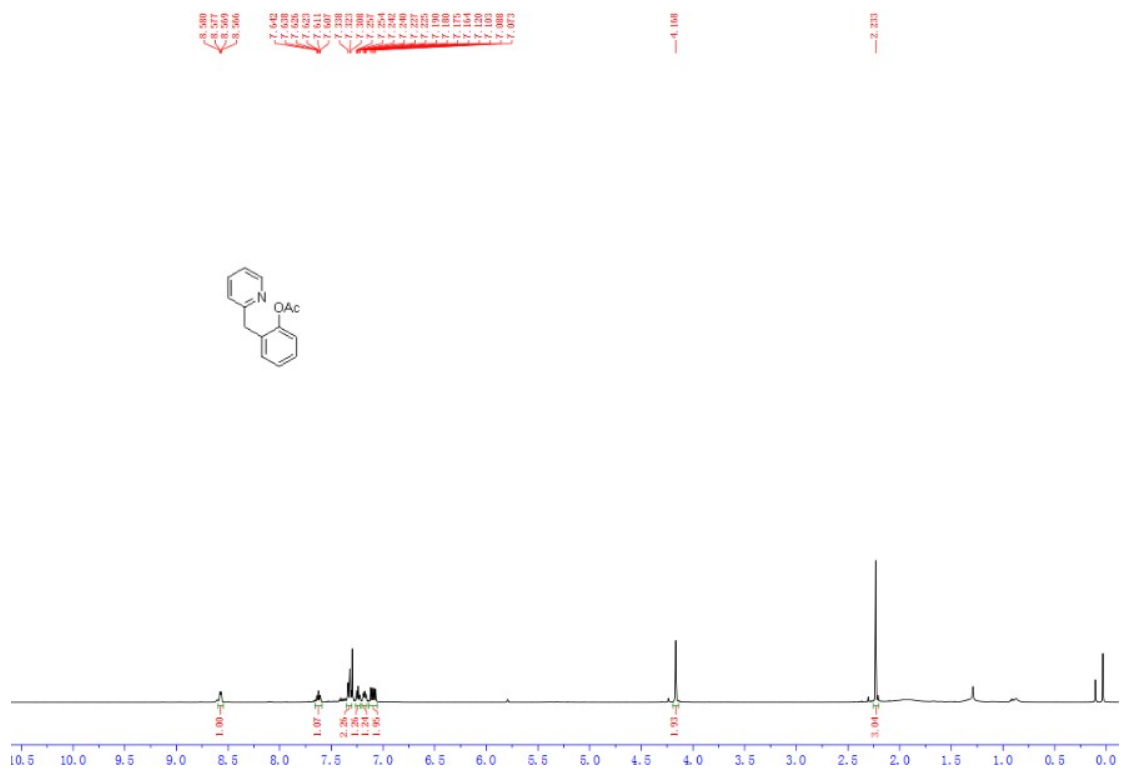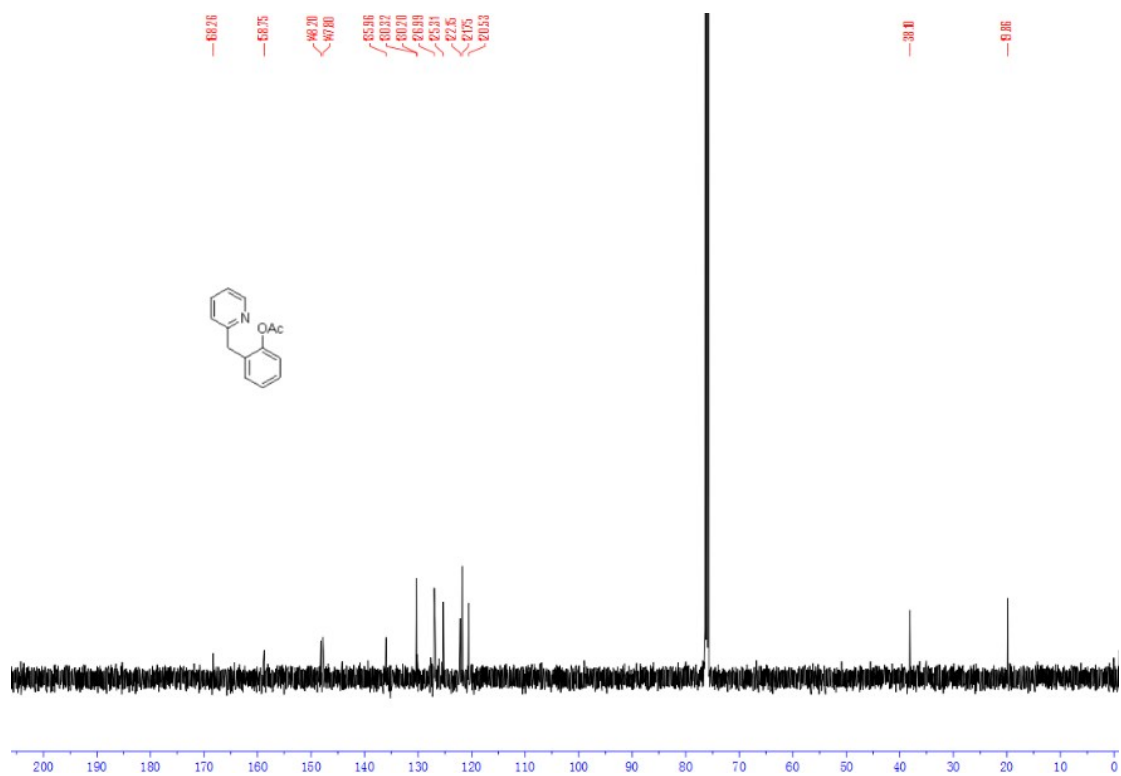



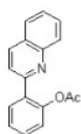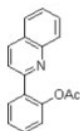

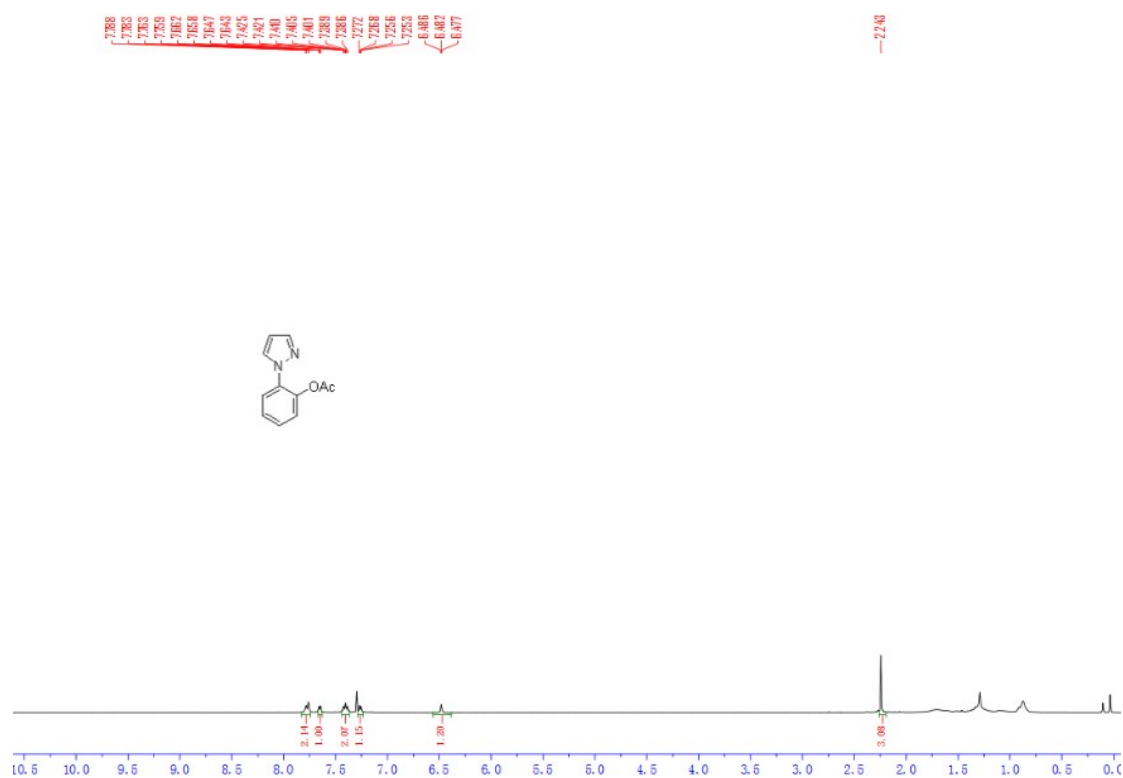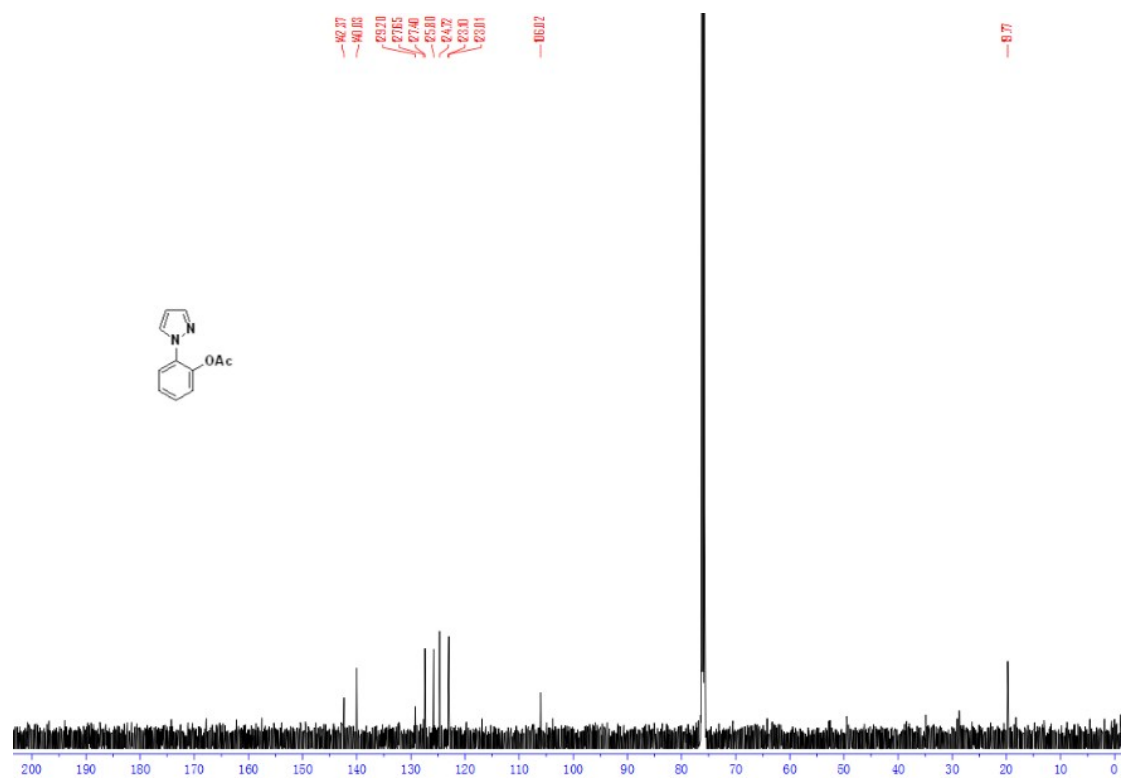

8.34  
8.27  
8.20  
7.84  
7.67  
7.62  
7.65  
7.59  
7.53  
7.52  
7.50  
7.44  
7.40  
7.37  
7.33  
7.28  
7.25  
7.21  
7.19  
7.17  
7.15  
7.13  
7.11  
7.09  
6.99  
6.97  
6.95  
3.83  
3.81

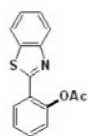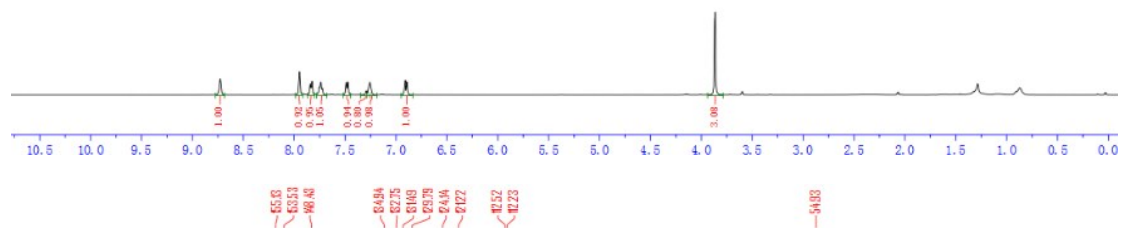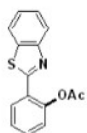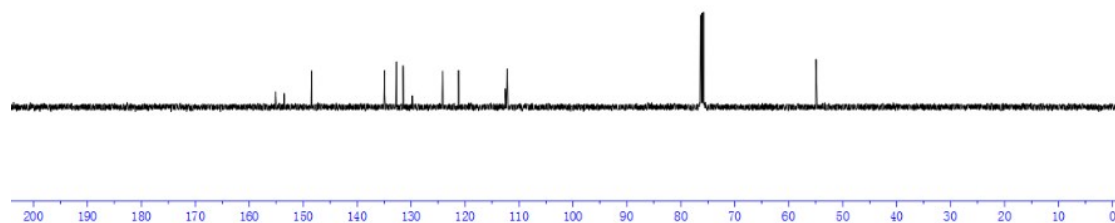

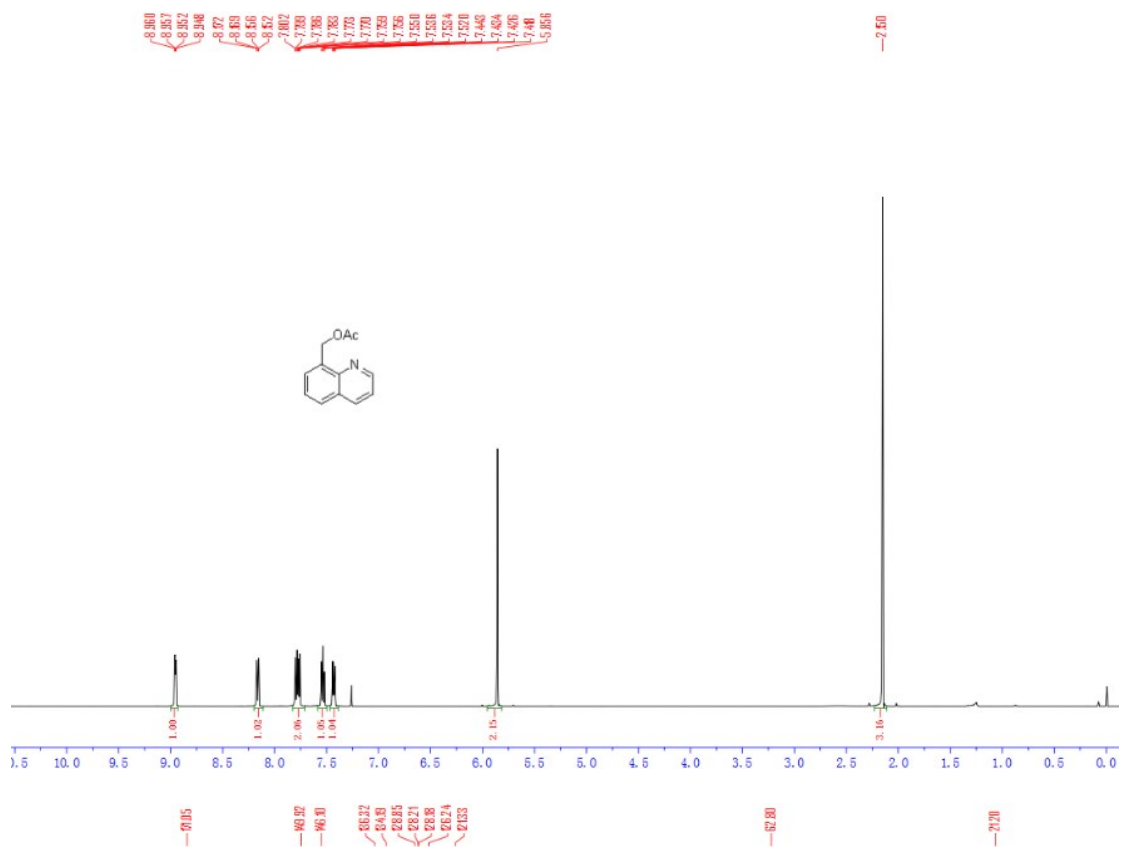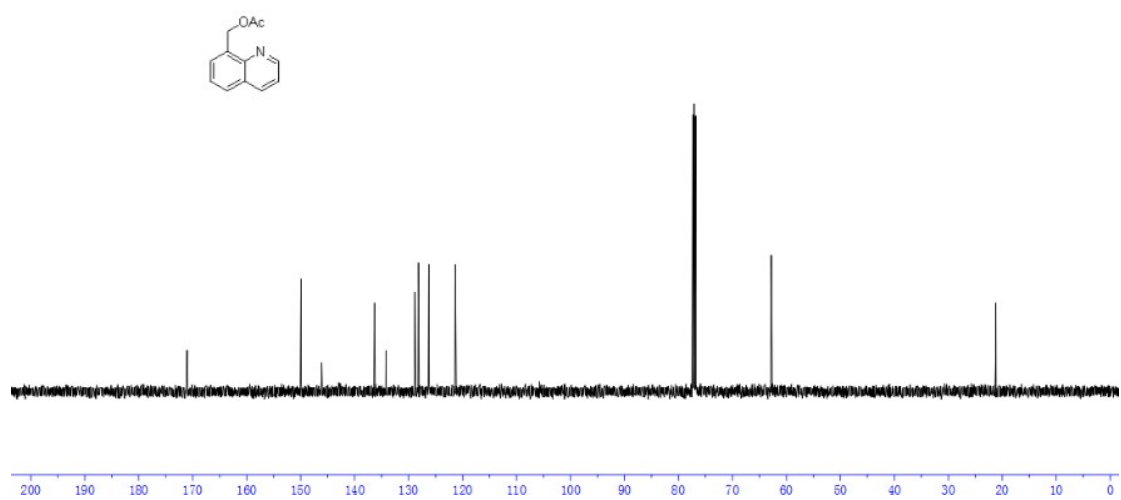

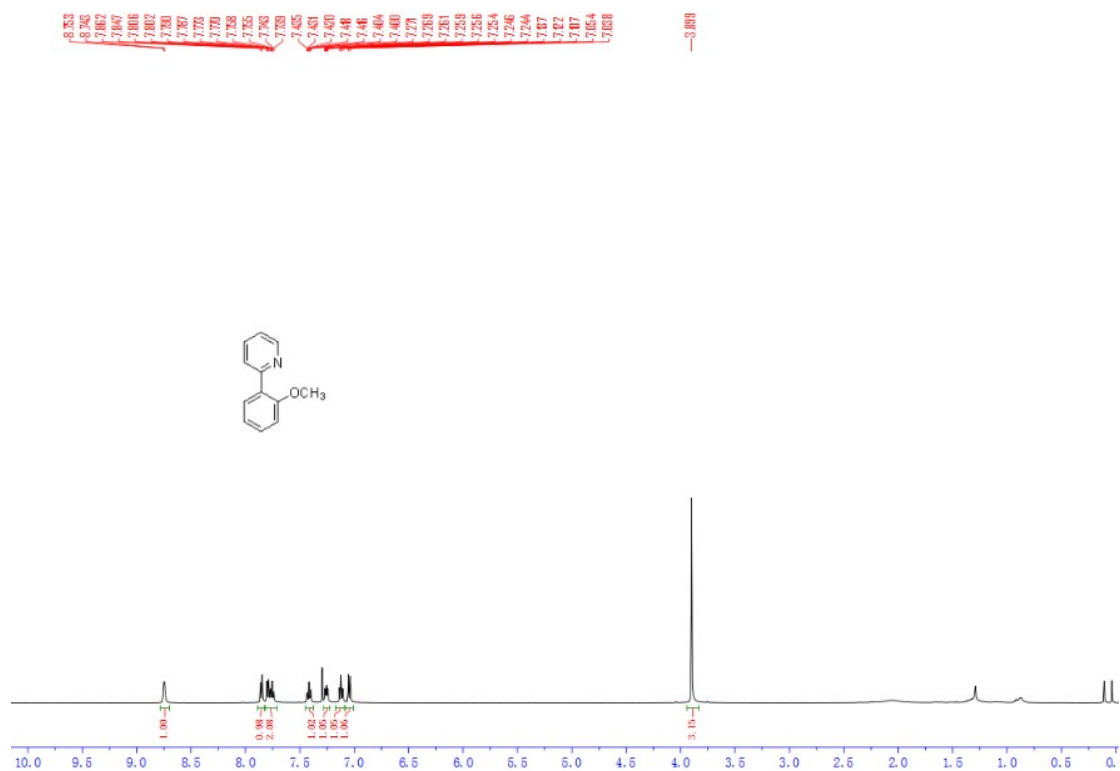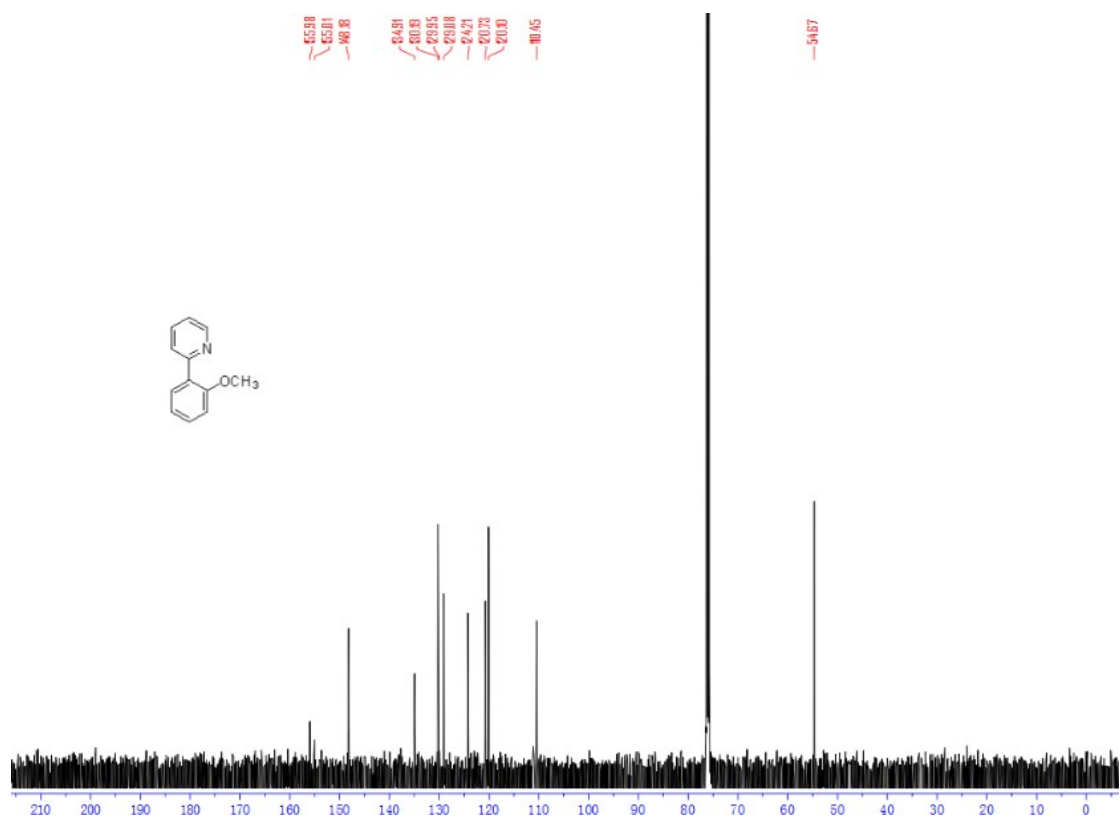

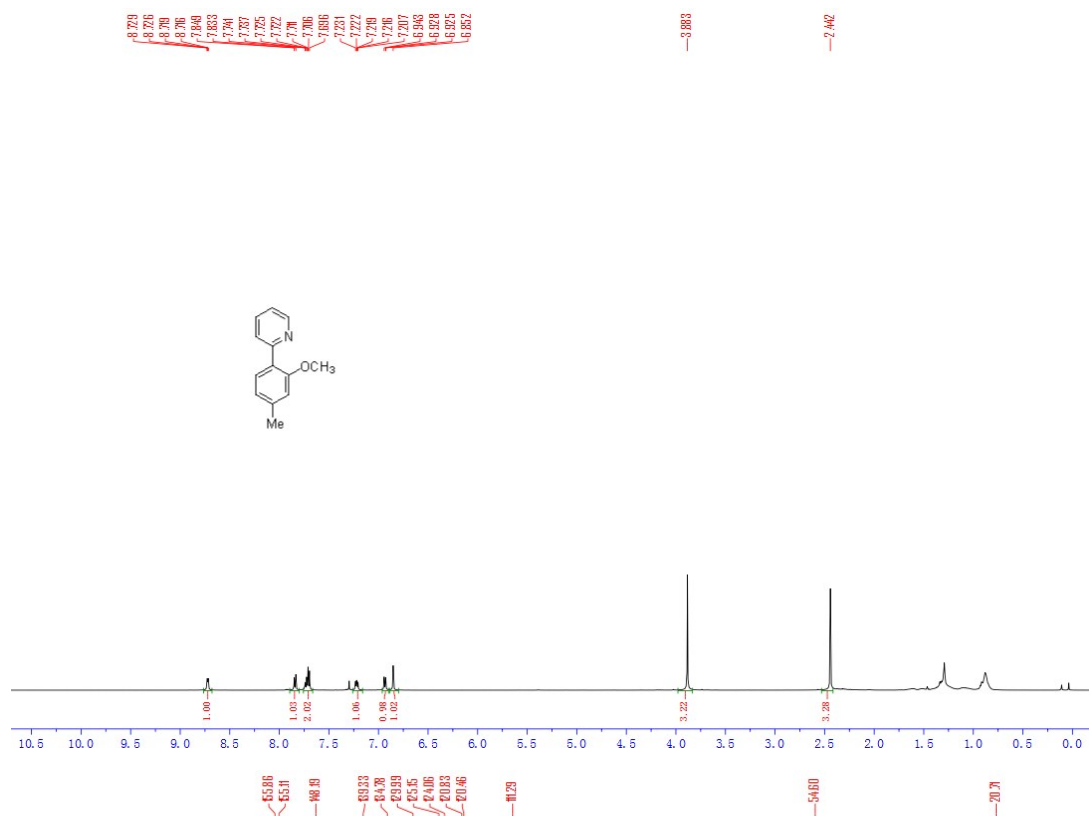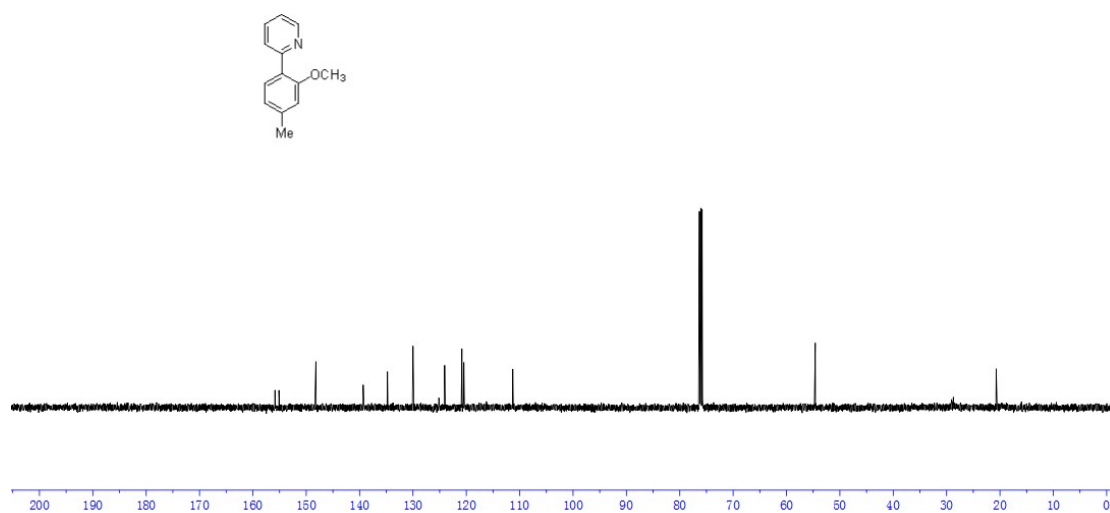

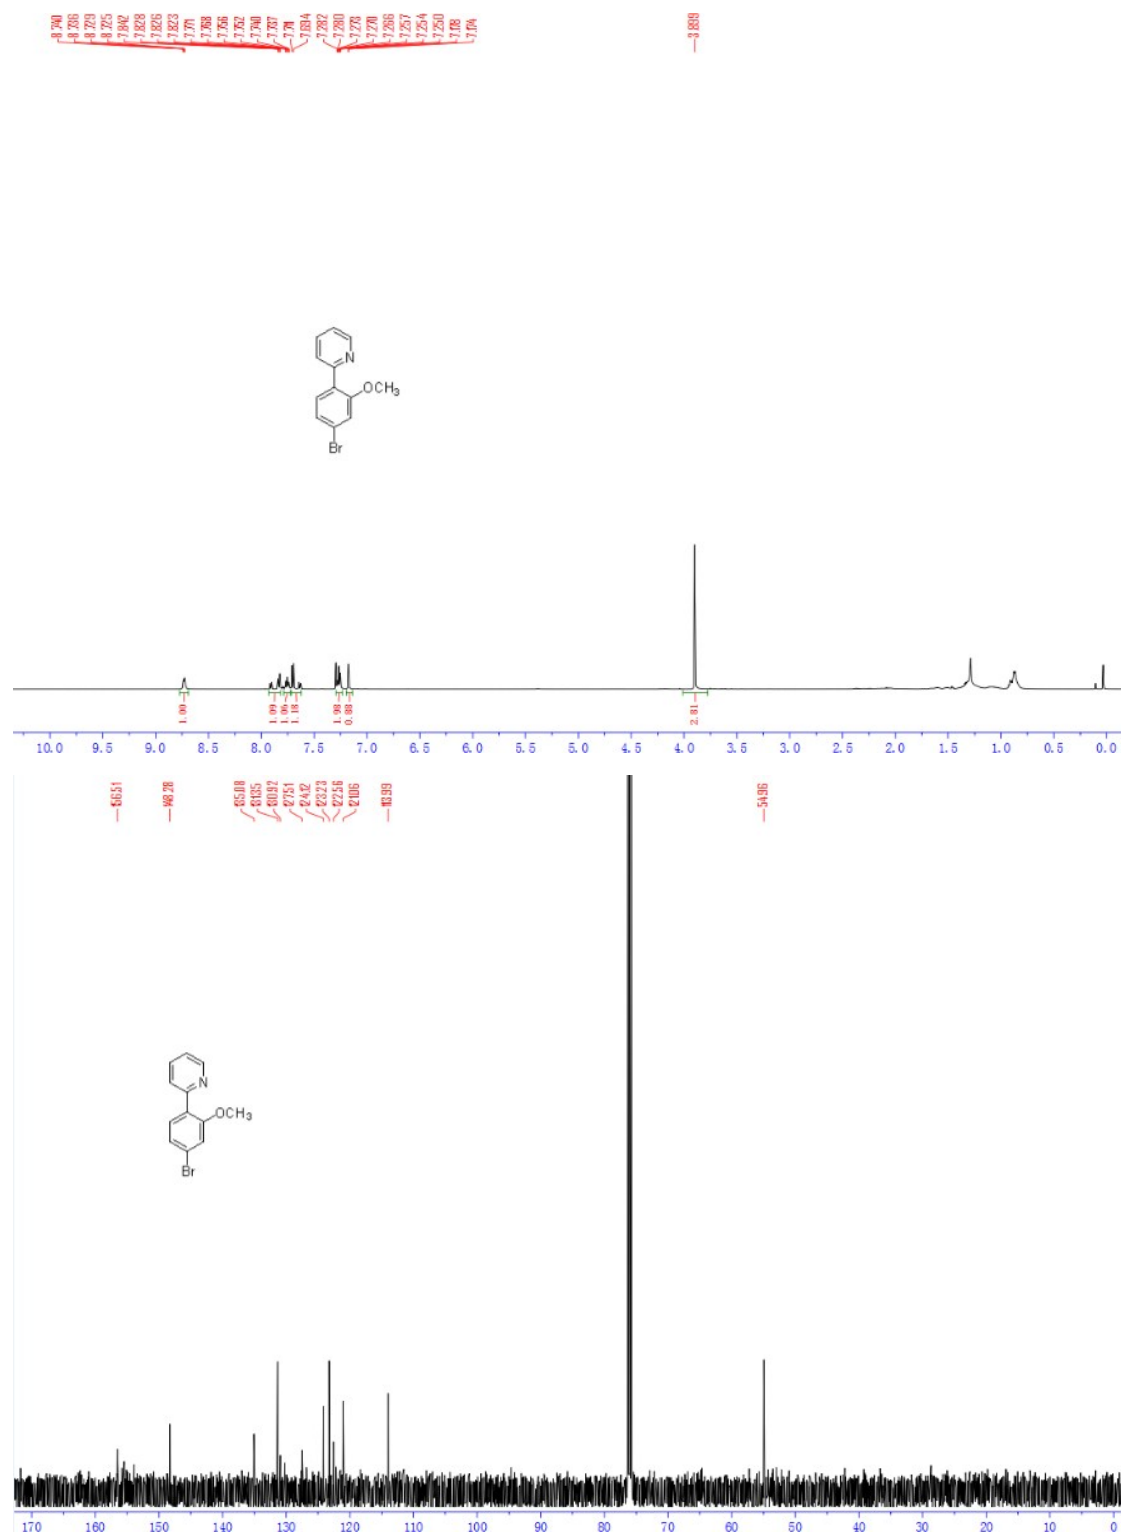

8.284  
8.261  
8.240  
8.245  
8.192  
8.056  
7.976  
7.960  
7.550  
7.544  
7.537  
7.534  
7.664  
7.662  
7.638  
7.286

2.56

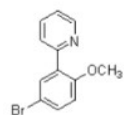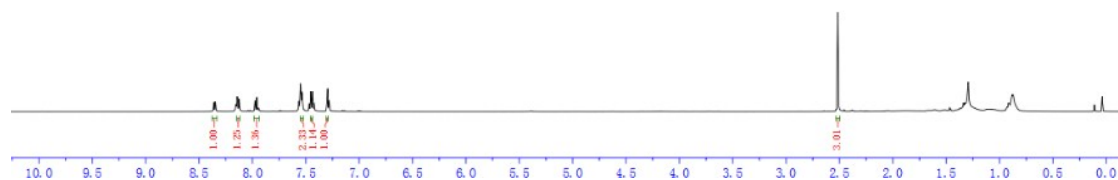

159.4  
158.46  
134.38  
130.58  
129.87  
126.88  
125.40  
124.44  
122.76  
122.41  
120.33

20.74

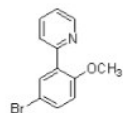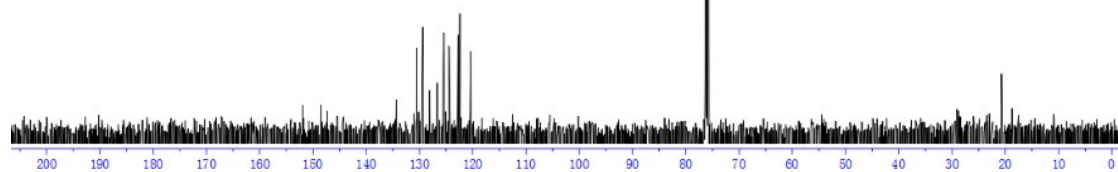



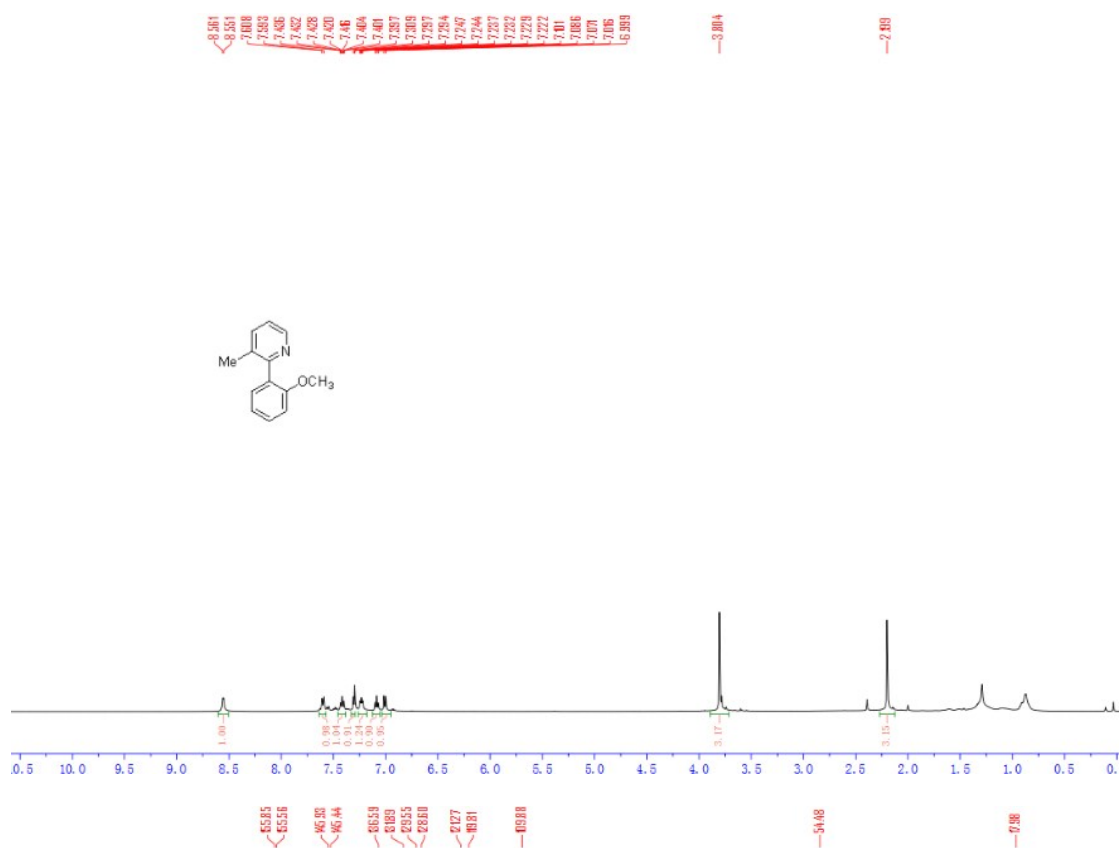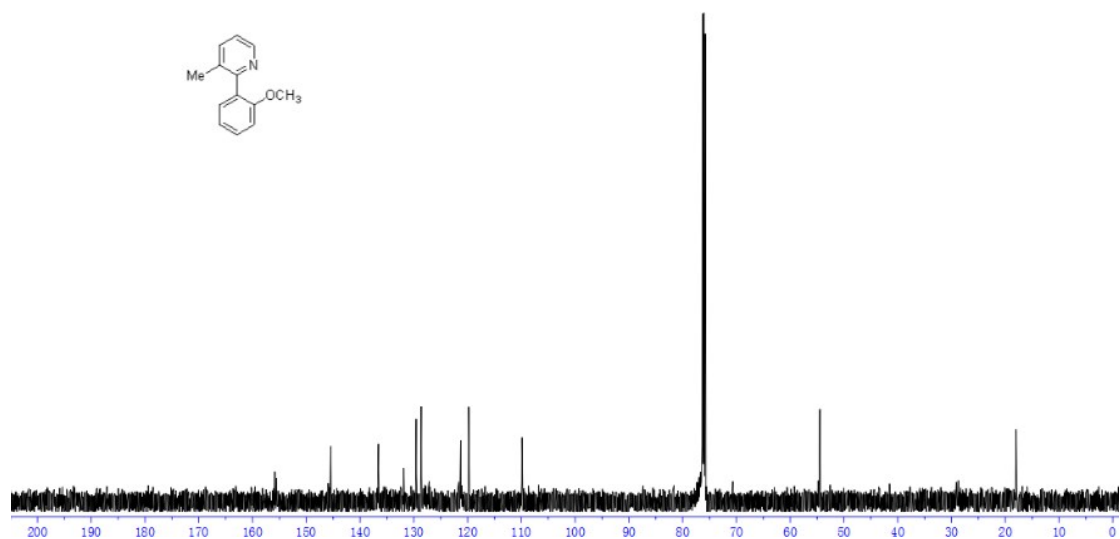

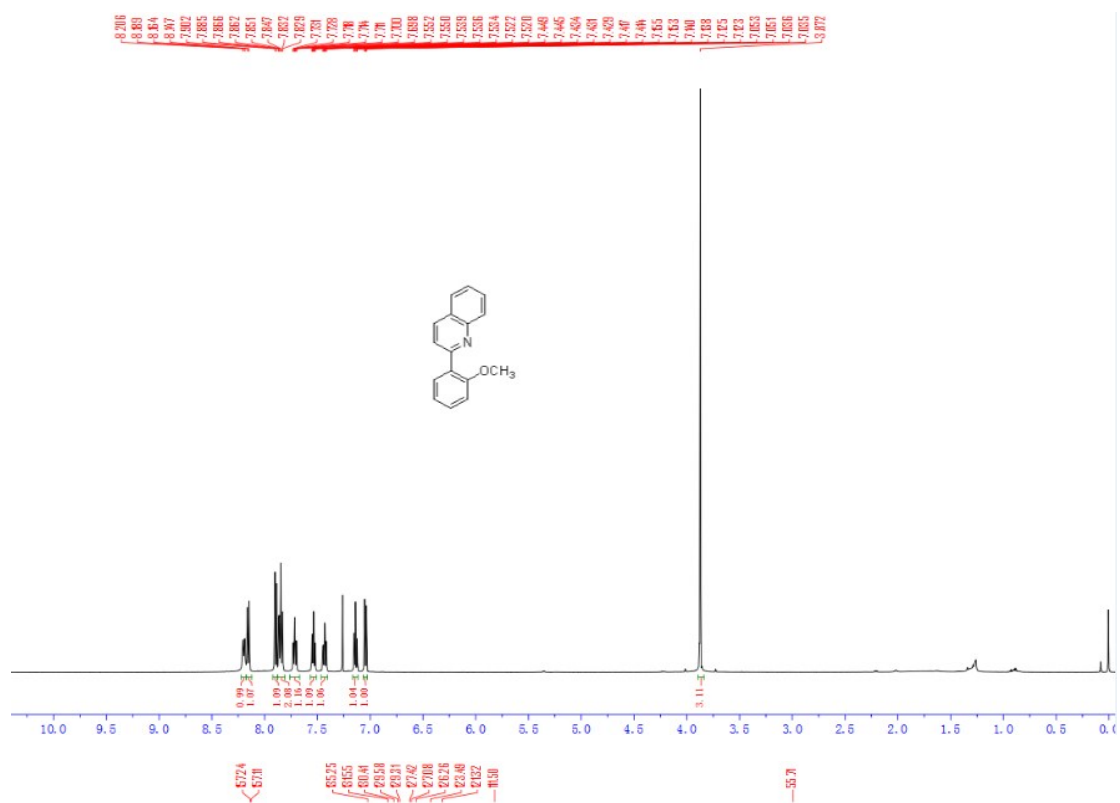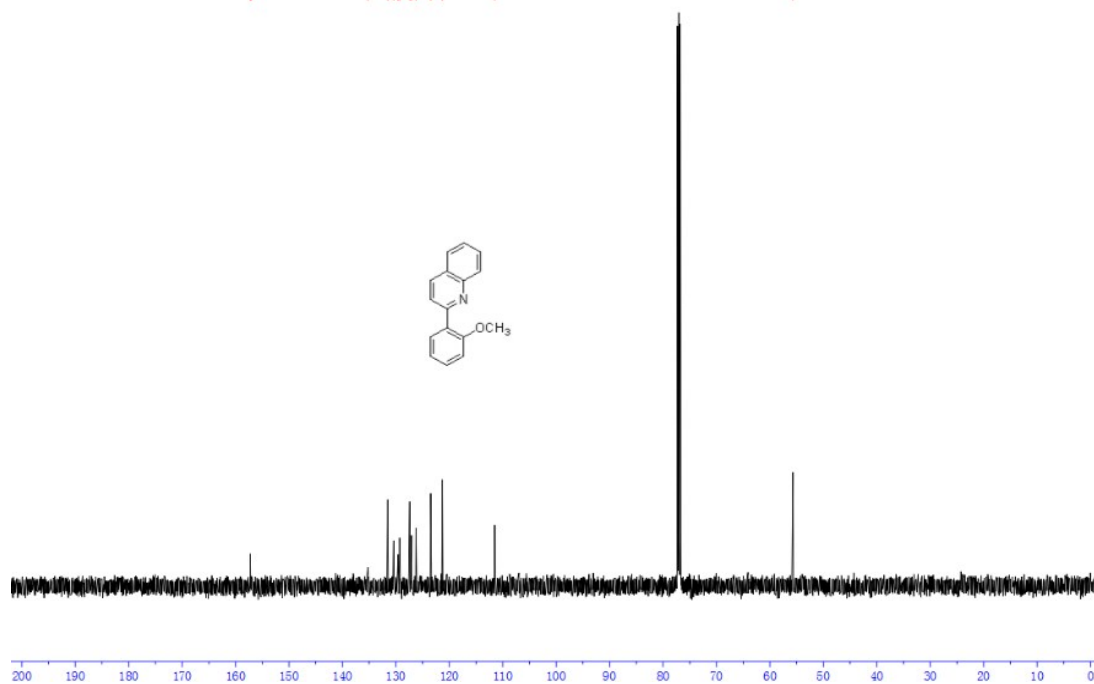

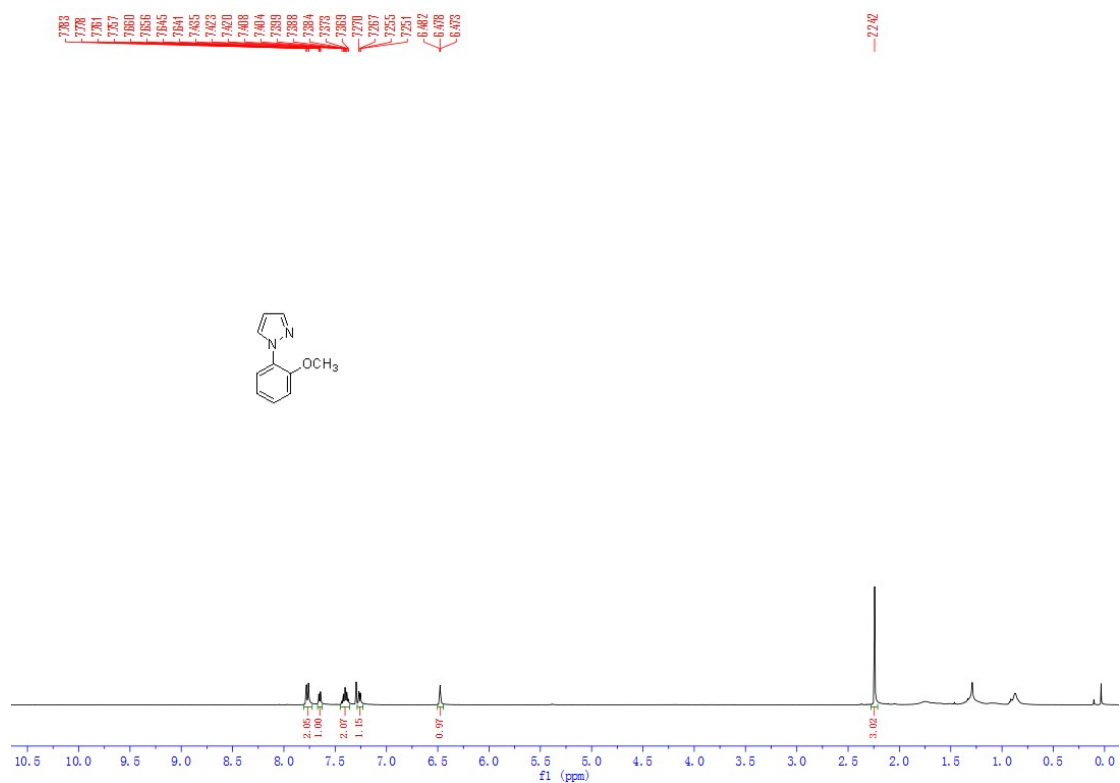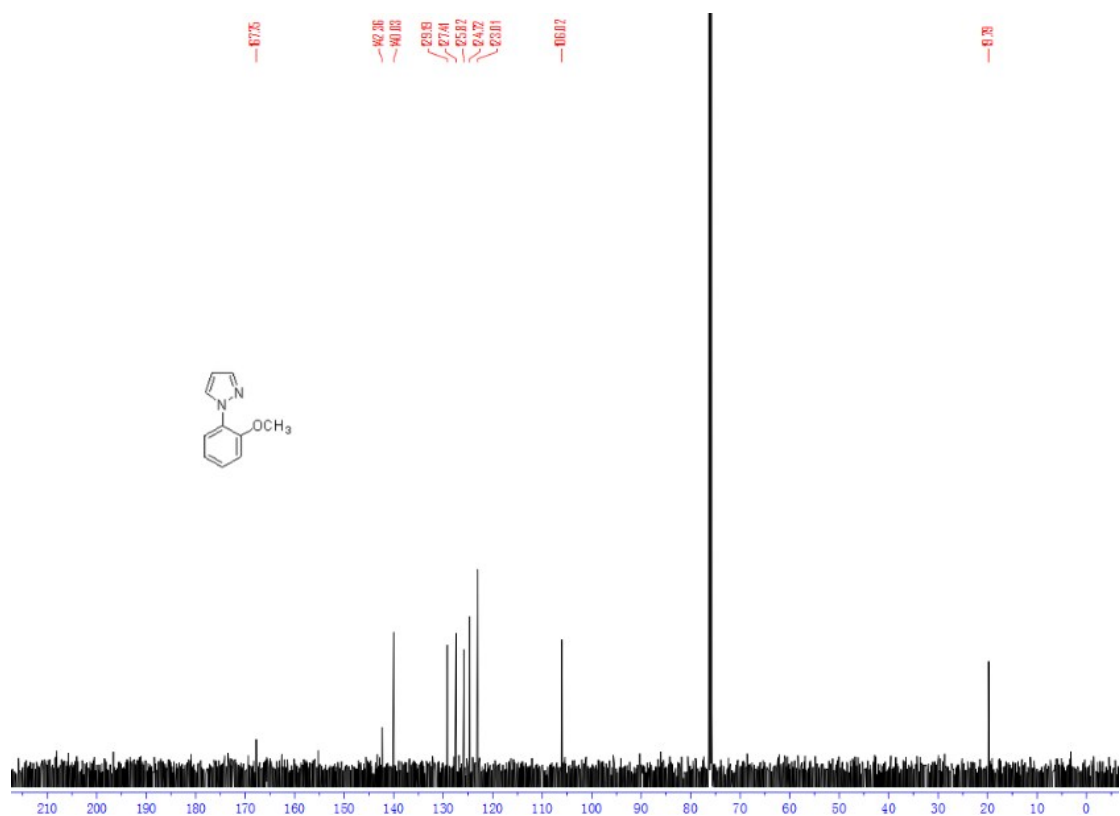

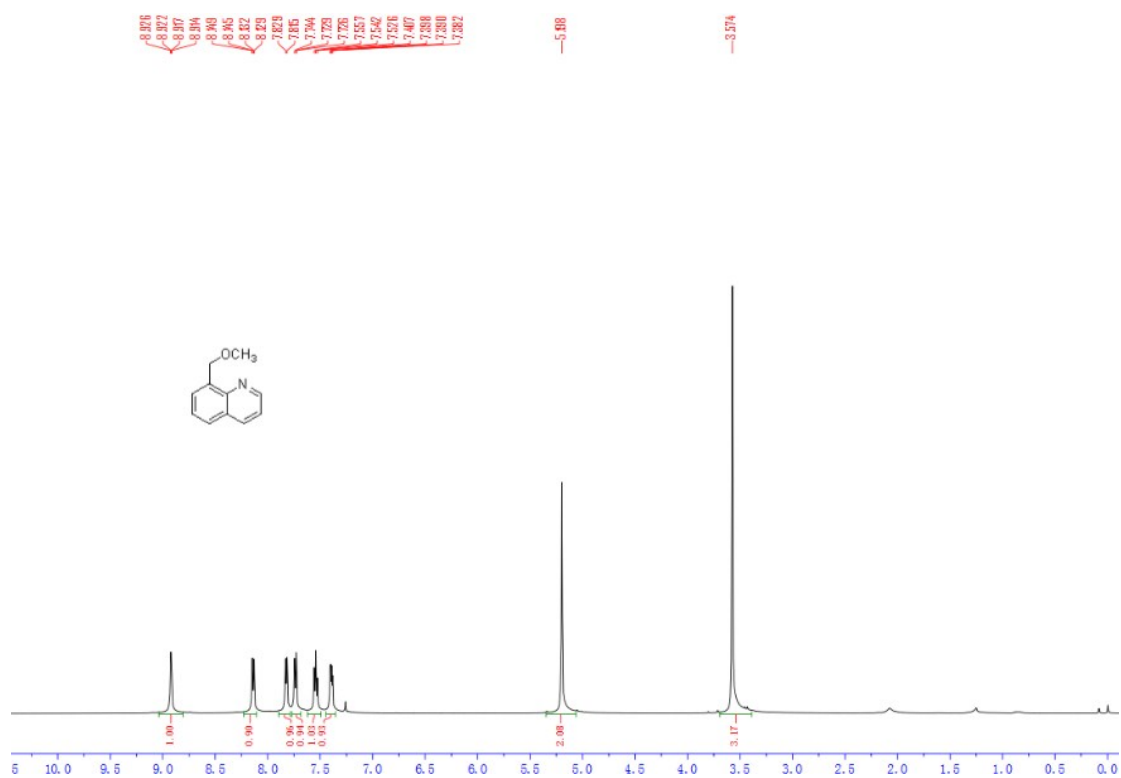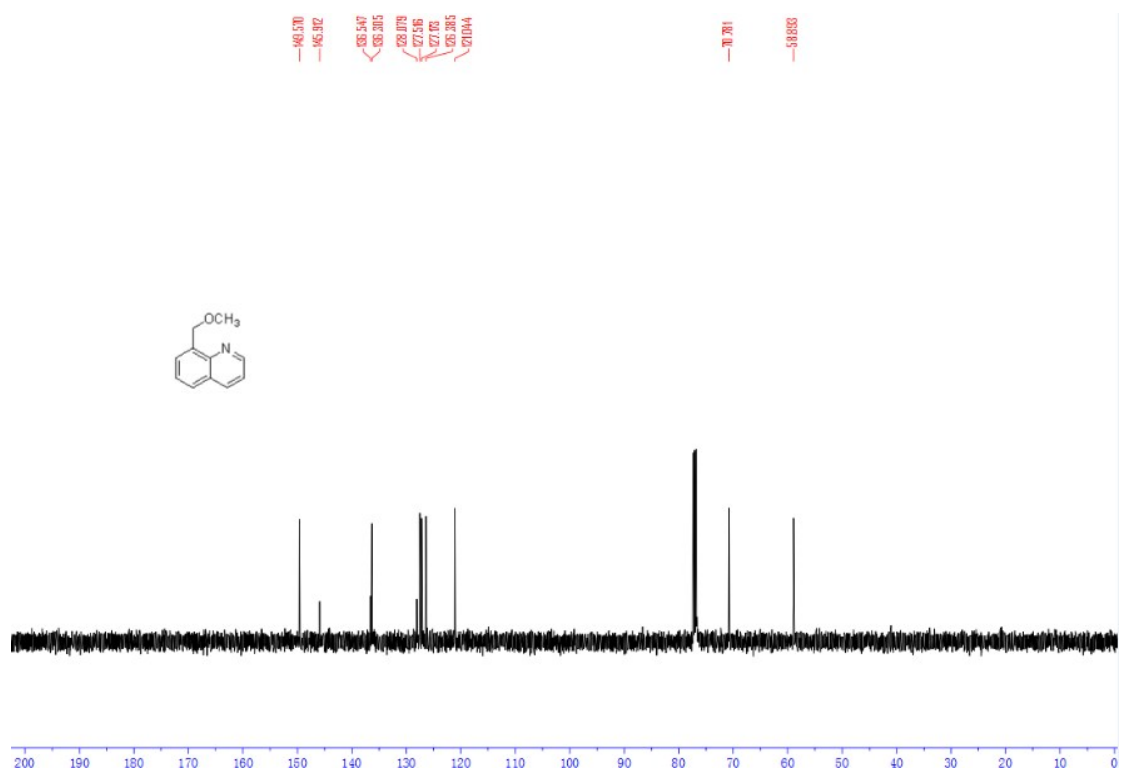

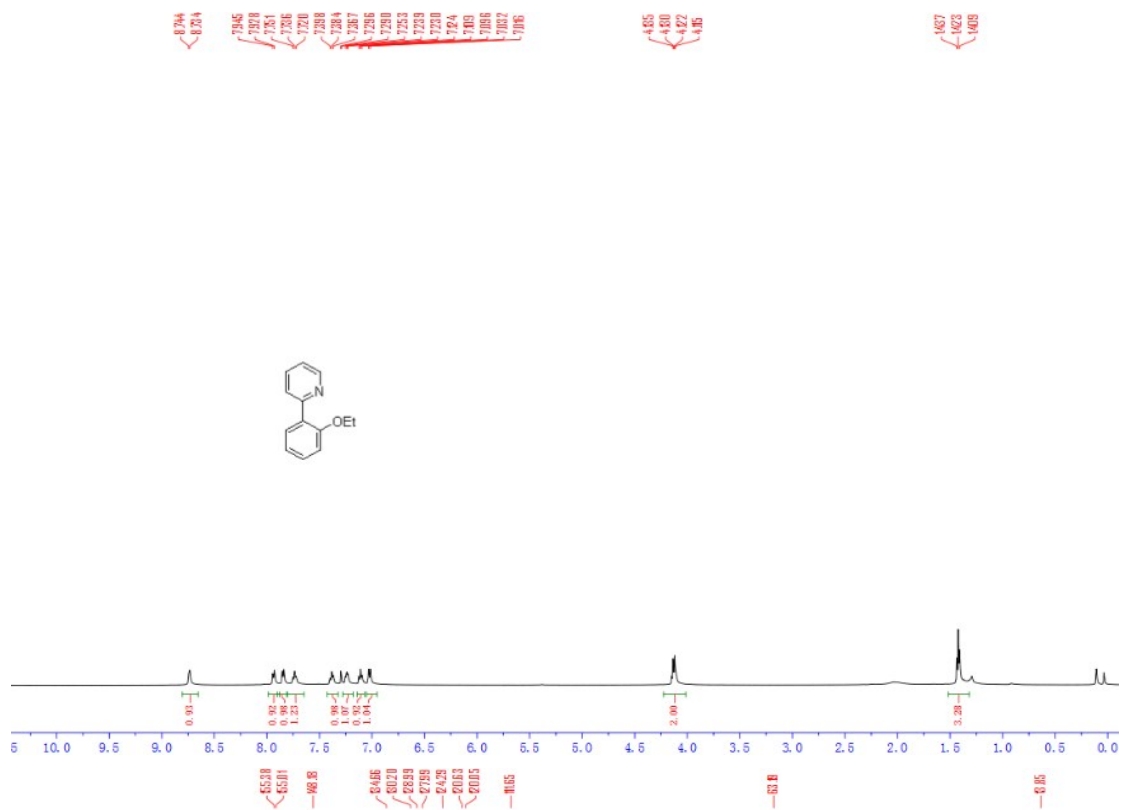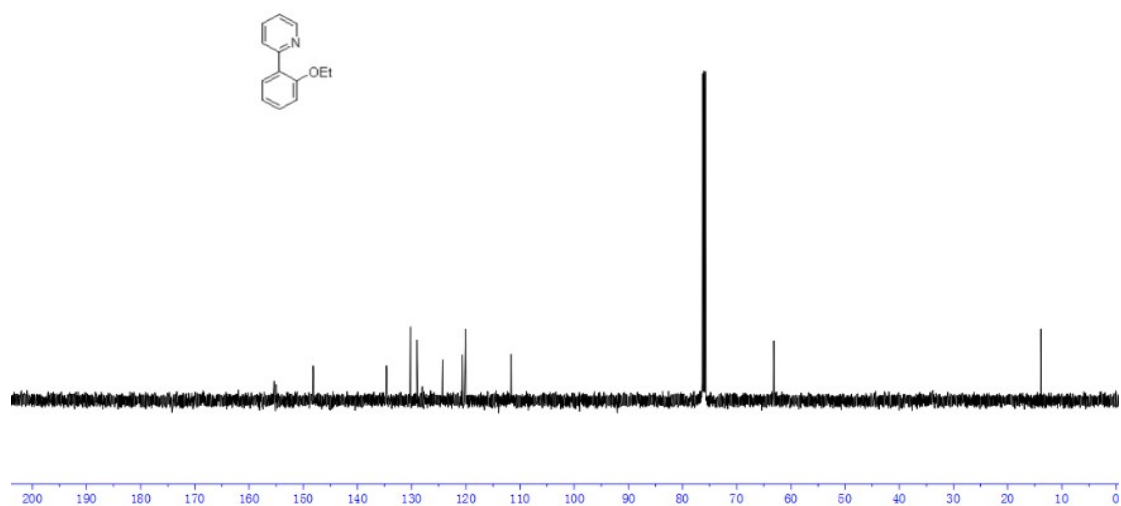

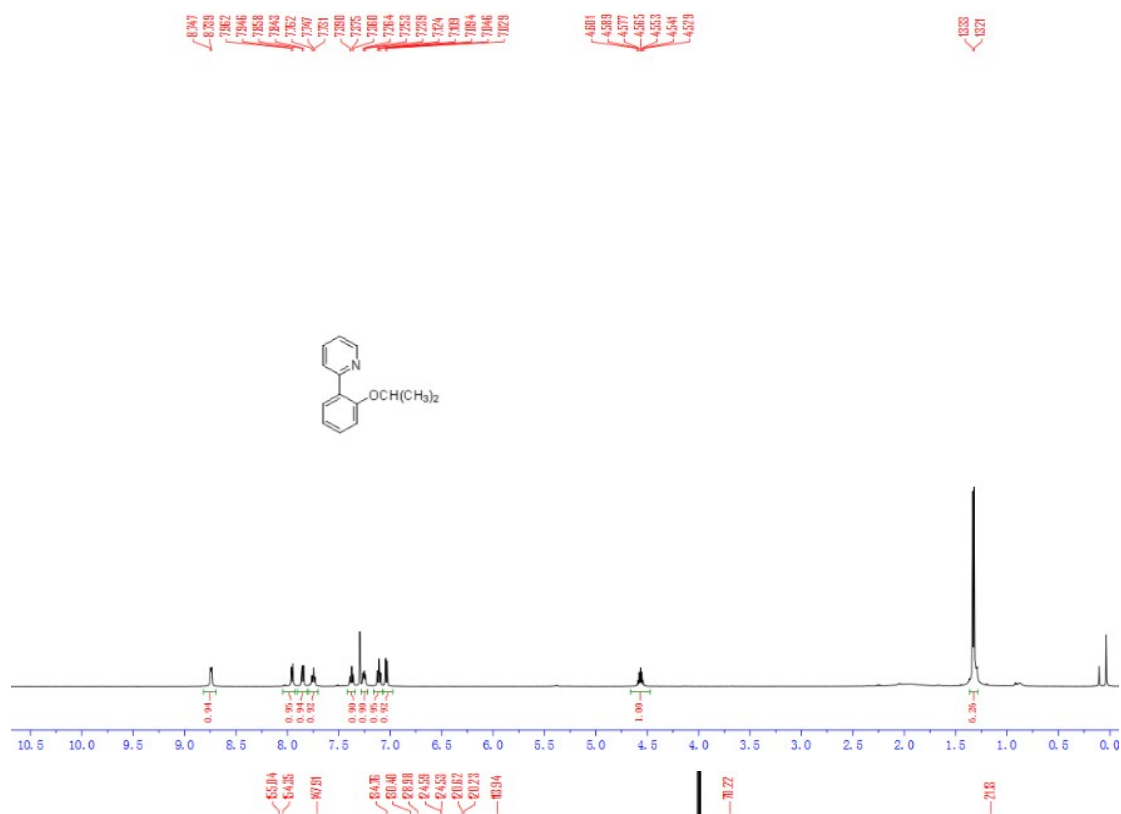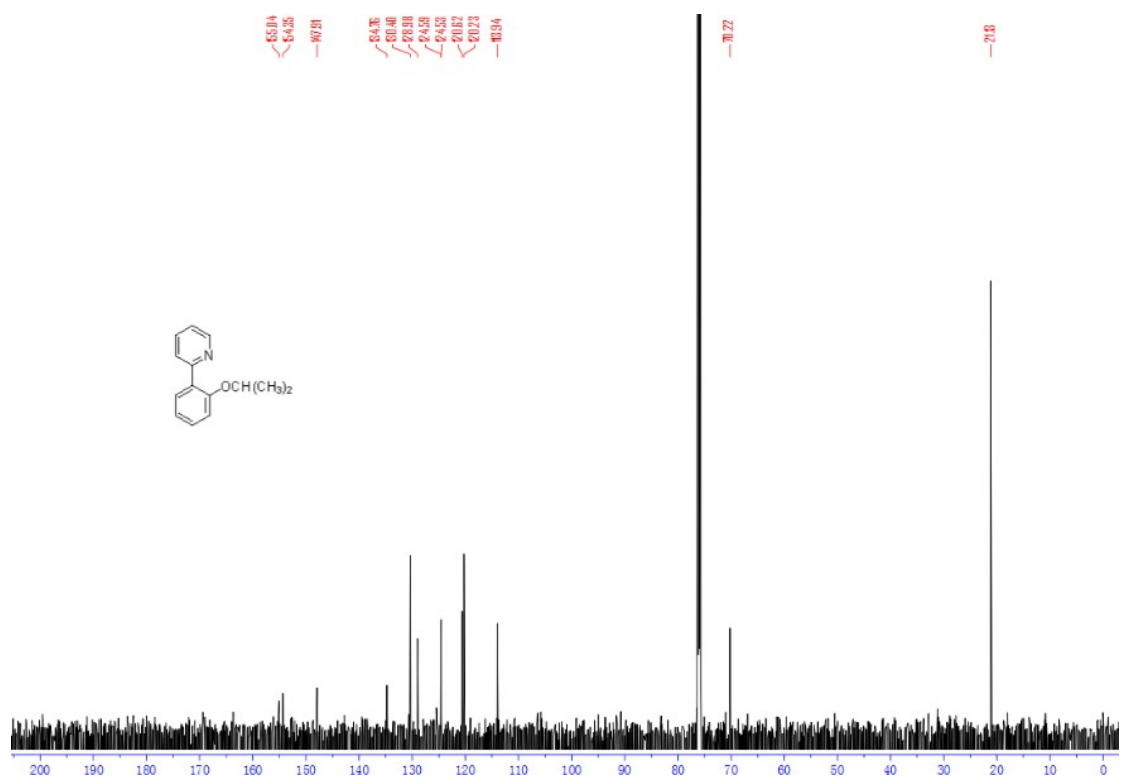

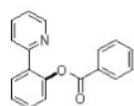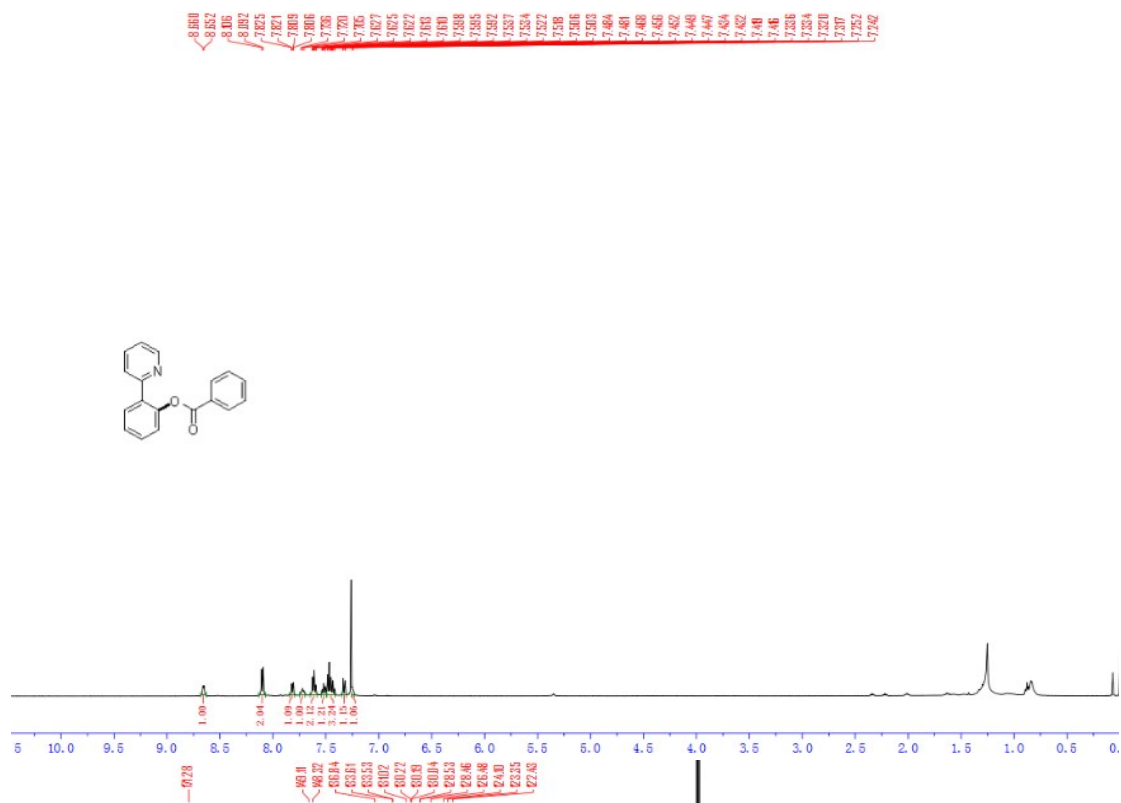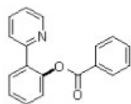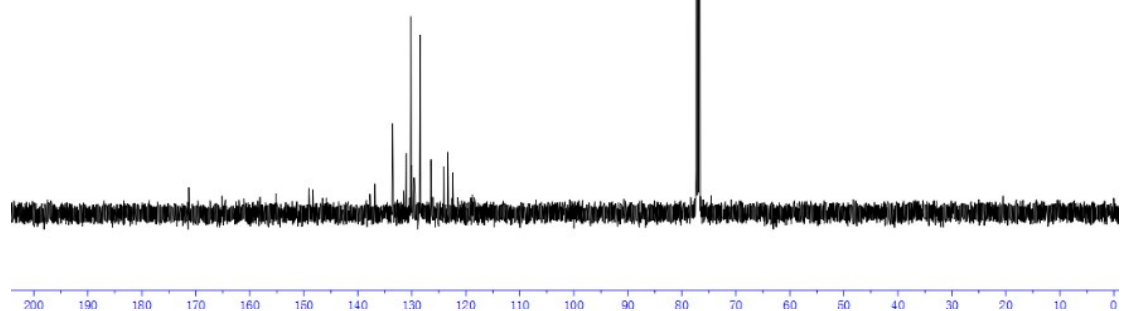

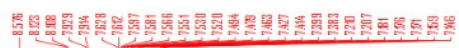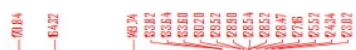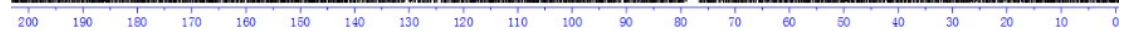



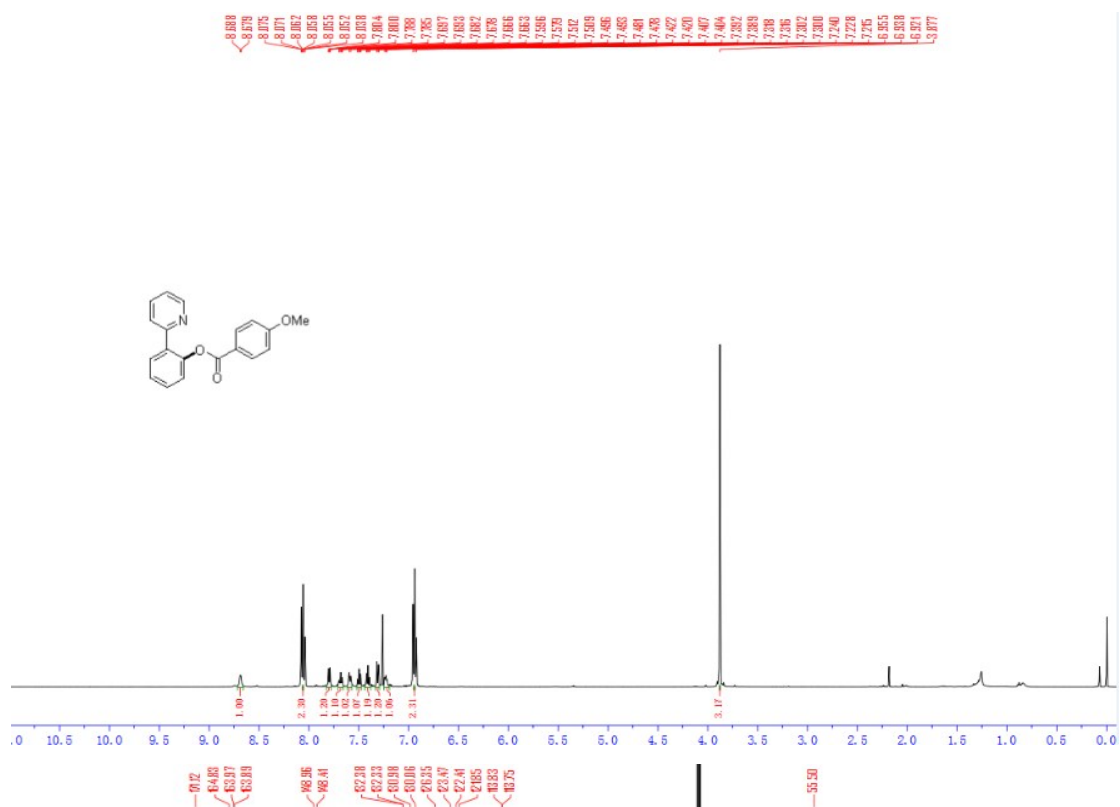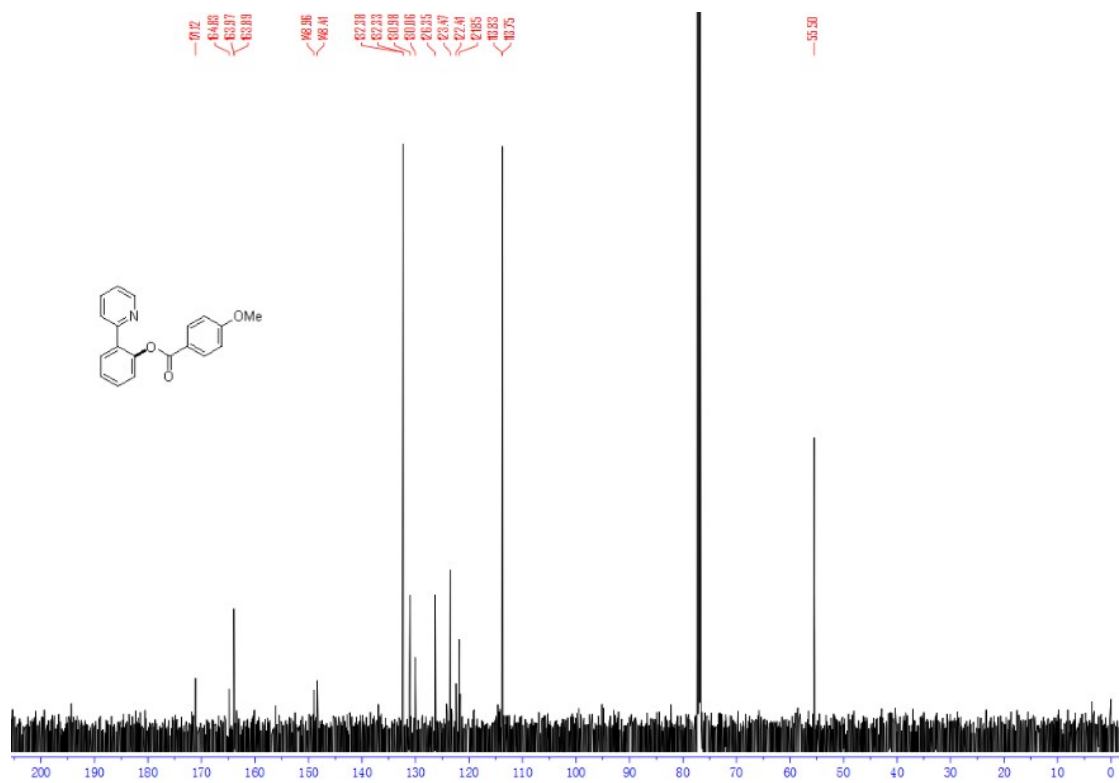

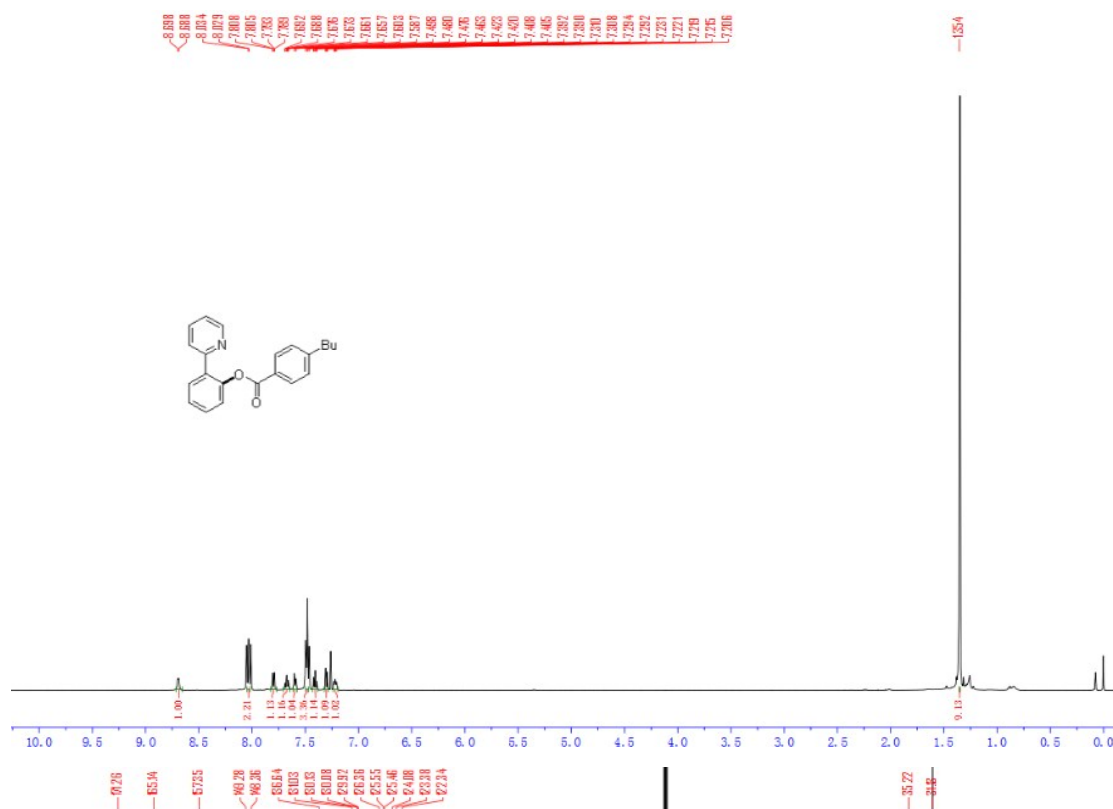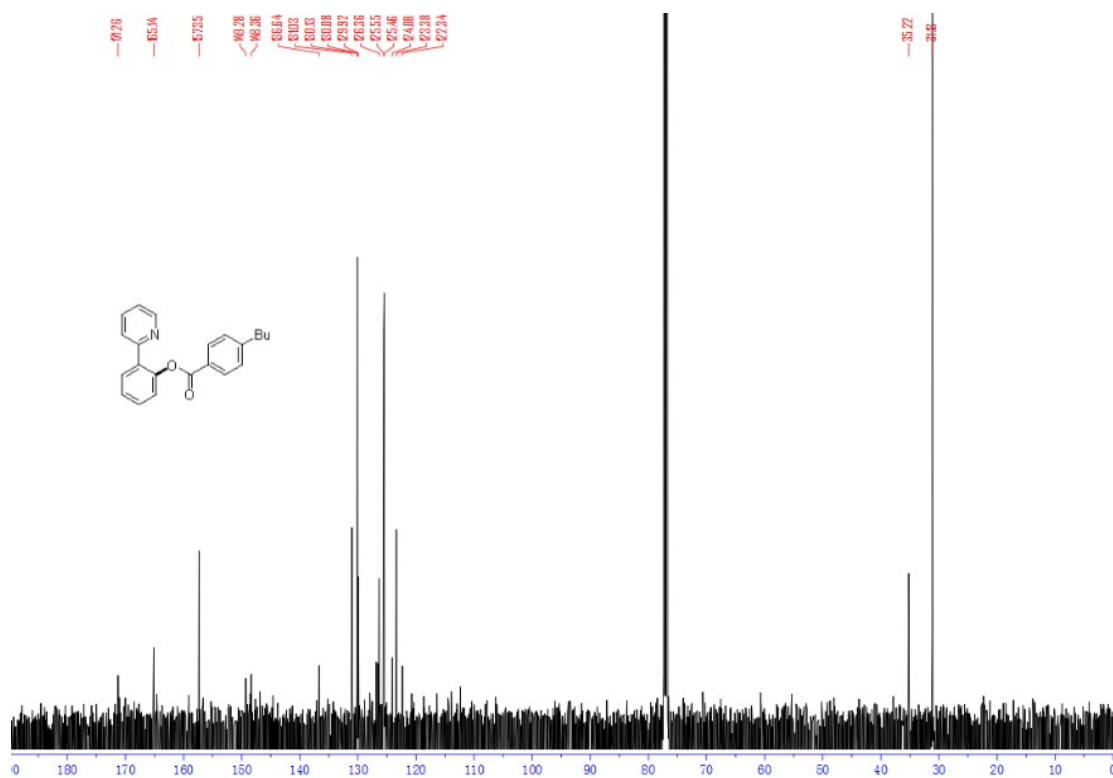

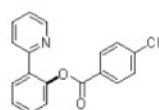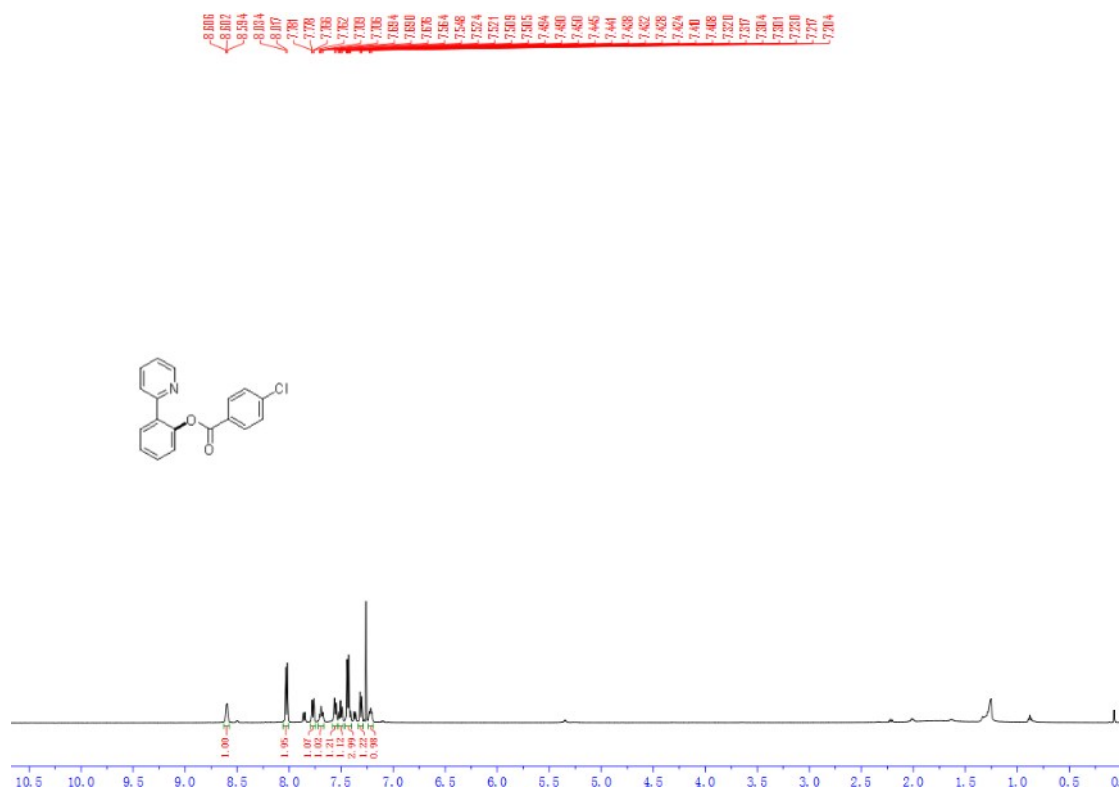

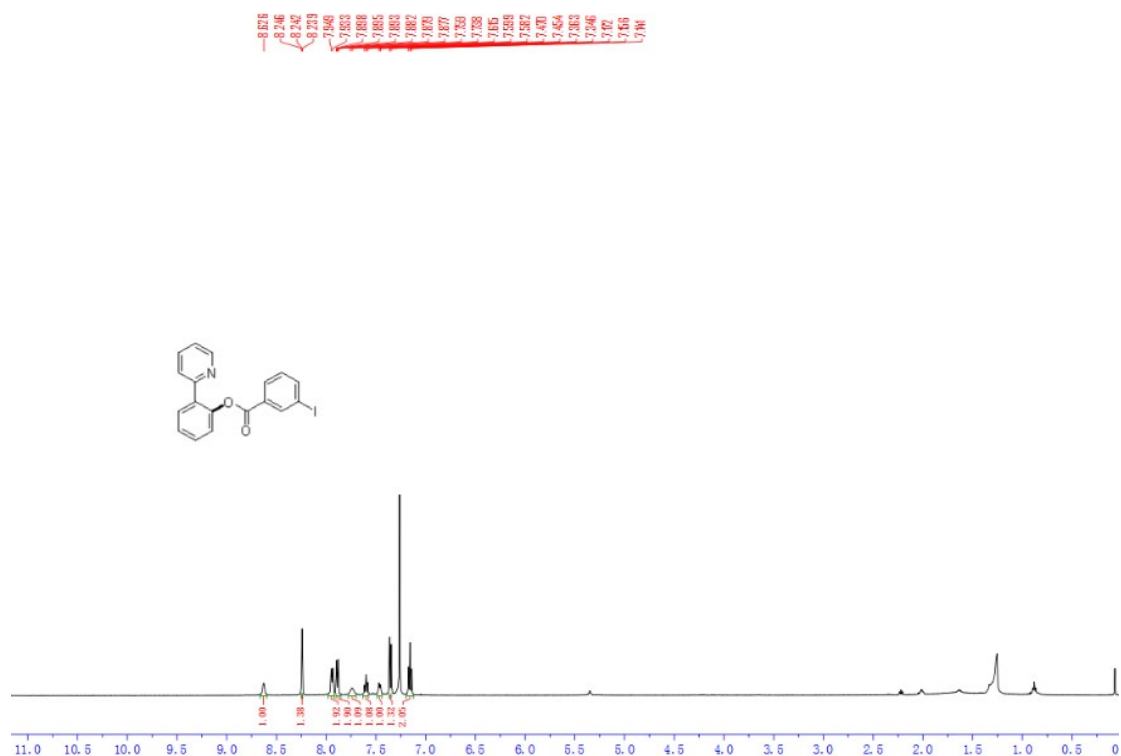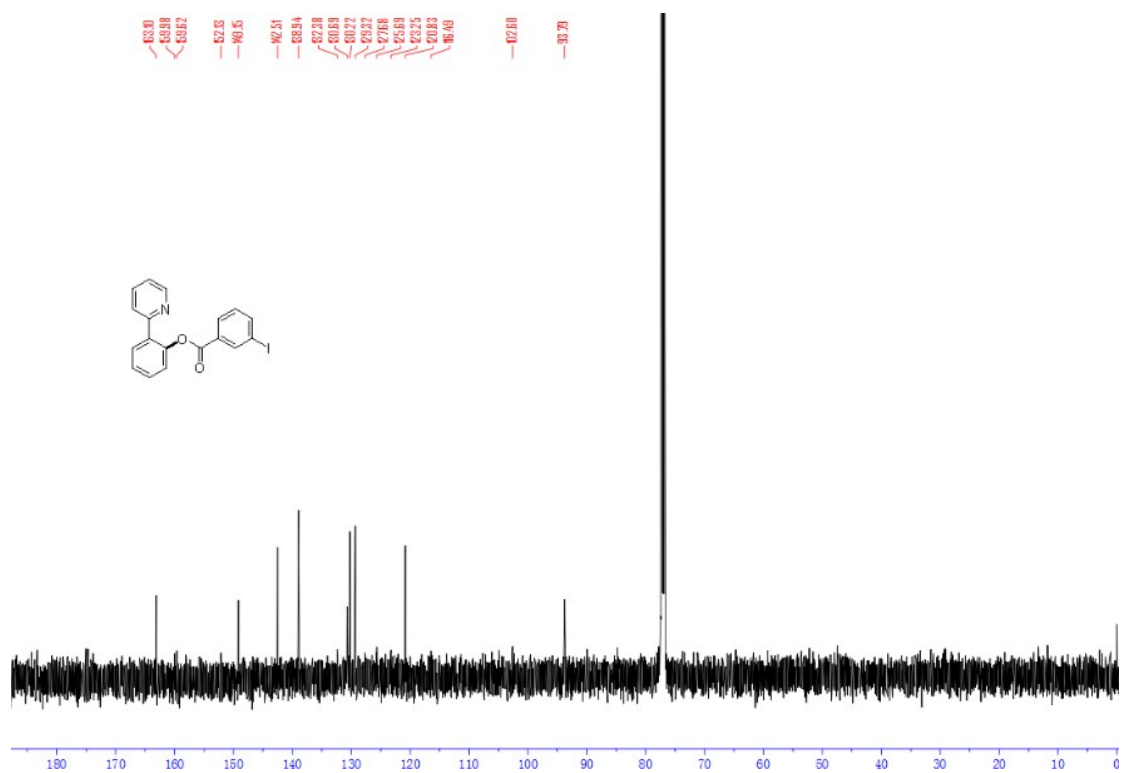

8.70  
8.65  
8.52  
8.46  
7.85  
7.83  
7.80  
7.78  
7.76  
7.73  
7.65  
7.60  
7.44  
7.43  
7.38  
7.04  
7.02  
6.97  
6.91

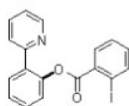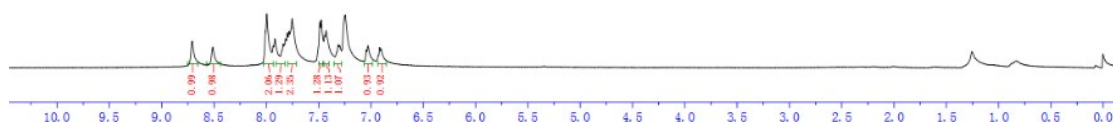

8.00  
7.93  
7.85  
7.84  
7.83  
7.82  
7.81  
7.80  
7.79  
7.78  
7.77  
7.76  
7.75  
7.74  
7.73  
7.72  
7.71  
7.70  
7.69  
7.68  
7.67  
7.66  
7.65  
7.64  
7.63  
7.62  
7.61  
7.60  
7.59  
7.58  
7.57  
7.56  
7.55  
7.54  
7.53  
7.52  
7.51  
7.50  
7.49  
7.48  
7.47  
7.46  
7.45  
7.44  
7.43  
7.42  
7.41  
7.40  
7.39  
7.38  
7.37  
7.36  
7.35  
7.34  
7.33  
7.32  
7.31  
7.30  
7.29  
7.28  
7.27  
7.26  
7.25  
7.24  
7.23  
7.22  
7.21  
7.20  
7.19  
7.18  
7.17  
7.16  
7.15  
7.14  
7.13  
7.12  
7.11  
7.10  
7.09  
7.08  
7.07  
7.06  
7.05  
7.04  
7.03  
7.02  
7.01  
7.00  
6.99  
6.98  
6.97  
6.96  
6.95  
6.94  
6.93  
6.92  
6.91  
6.90  
6.89  
6.88  
6.87  
6.86  
6.85  
6.84  
6.83  
6.82  
6.81  
6.80  
6.79  
6.78  
6.77  
6.76  
6.75  
6.74  
6.73  
6.72  
6.71  
6.70  
6.69  
6.68  
6.67  
6.66  
6.65  
6.64  
6.63  
6.62  
6.61  
6.60  
6.59  
6.58  
6.57  
6.56  
6.55  
6.54  
6.53  
6.52  
6.51  
6.50  
6.49  
6.48  
6.47  
6.46  
6.45  
6.44  
6.43  
6.42  
6.41  
6.40  
6.39  
6.38  
6.37  
6.36  
6.35  
6.34  
6.33  
6.32  
6.31  
6.30  
6.29  
6.28  
6.27  
6.26  
6.25  
6.24  
6.23  
6.22  
6.21  
6.20  
6.19  
6.18  
6.17  
6.16  
6.15  
6.14  
6.13  
6.12  
6.11  
6.10  
6.09  
6.08  
6.07  
6.06  
6.05  
6.04  
6.03  
6.02  
6.01  
6.00  
5.99  
5.98  
5.97  
5.96  
5.95  
5.94  
5.93  
5.92  
5.91  
5.90  
5.89  
5.88  
5.87  
5.86  
5.85  
5.84  
5.83  
5.82  
5.81  
5.80  
5.79  
5.78  
5.77  
5.76  
5.75  
5.74  
5.73  
5.72  
5.71  
5.70  
5.69  
5.68  
5.67  
5.66  
5.65  
5.64  
5.63  
5.62  
5.61  
5.60  
5.59  
5.58  
5.57  
5.56  
5.55  
5.54  
5.53  
5.52  
5.51  
5.50  
5.49  
5.48  
5.47  
5.46  
5.45  
5.44  
5.43  
5.42  
5.41  
5.40  
5.39  
5.38  
5.37  
5.36  
5.35  
5.34  
5.33  
5.32  
5.31  
5.30  
5.29  
5.28  
5.27  
5.26  
5.25  
5.24  
5.23  
5.22  
5.21  
5.20  
5.19  
5.18  
5.17  
5.16  
5.15  
5.14  
5.13  
5.12  
5.11  
5.10  
5.09  
5.08  
5.07  
5.06  
5.05  
5.04  
5.03  
5.02  
5.01  
5.00  
4.99  
4.98  
4.97  
4.96  
4.95  
4.94  
4.93  
4.92  
4.91  
4.90  
4.89  
4.88  
4.87  
4.86  
4.85  
4.84  
4.83  
4.82  
4.81  
4.80  
4.79  
4.78  
4.77  
4.76  
4.75  
4.74  
4.73  
4.72  
4.71  
4.70  
4.69  
4.68  
4.67  
4.66  
4.65  
4.64  
4.63  
4.62  
4.61  
4.60  
4.59  
4.58  
4.57  
4.56  
4.55  
4.54  
4.53  
4.52  
4.51  
4.50  
4.49  
4.48  
4.47  
4.46  
4.45  
4.44  
4.43  
4.42  
4.41  
4.40  
4.39  
4.38  
4.37  
4.36  
4.35  
4.34  
4.33  
4.32  
4.31  
4.30  
4.29  
4.28  
4.27  
4.26  
4.25  
4.24  
4.23  
4.22  
4.21  
4.20  
4.19  
4.18  
4.17  
4.16  
4.15  
4.14  
4.13  
4.12  
4.11  
4.10  
4.09  
4.08  
4.07  
4.06  
4.05  
4.04  
4.03  
4.02  
4.01  
4.00  
3.99  
3.98  
3.97  
3.96  
3.95  
3.94  
3.93  
3.92  
3.91  
3.90  
3.89  
3.88  
3.87  
3.86  
3.85  
3.84  
3.83  
3.82  
3.81  
3.80  
3.79  
3.78  
3.77  
3.76  
3.75  
3.74  
3.73  
3.72  
3.71  
3.70  
3.69  
3.68  
3.67  
3.66  
3.65  
3.64  
3.63  
3.62  
3.61  
3.60  
3.59  
3.58  
3.57  
3.56  
3.55  
3.54  
3.53  
3.52  
3.51  
3.50  
3.49  
3.48  
3.47  
3.46  
3.45  
3.44  
3.43  
3.42  
3.41  
3.40  
3.39  
3.38  
3.37  
3.36  
3.35  
3.34  
3.33  
3.32  
3.31  
3.30  
3.29  
3.28  
3.27  
3.26  
3.25  
3.24  
3.23  
3.22  
3.21  
3.20  
3.19  
3.18  
3.17  
3.16  
3.15  
3.14  
3.13  
3.12  
3.11  
3.10  
3.09  
3.08  
3.07  
3.06  
3.05  
3.04  
3.03  
3.02  
3.01  
3.00  
2.99  
2.98  
2.97  
2.96  
2.95  
2.94  
2.93  
2.92  
2.91  
2.90  
2.89  
2.88  
2.87  
2.86  
2.85  
2.84  
2.83  
2.82  
2.81  
2.80  
2.79  
2.78  
2.77  
2.76  
2.75  
2.74  
2.73  
2.72  
2.71  
2.70  
2.69  
2.68  
2.67  
2.66  
2.65  
2.64  
2.63  
2.62  
2.61  
2.60  
2.59  
2.58  
2.57  
2.56  
2.55  
2.54  
2.53  
2.52  
2.51  
2.50  
2.49  
2.48  
2.47  
2.46  
2.45  
2.44  
2.43  
2.42  
2.41  
2.40  
2.39  
2.38  
2.37  
2.36  
2.35  
2.34  
2.33  
2.32  
2.31  
2.30  
2.29  
2.28  
2.27  
2.26  
2.25  
2.24  
2.23  
2.22  
2.21  
2.20  
2.19  
2.18  
2.17  
2.16  
2.15  
2.14  
2.13  
2.12  
2.11  
2.10  
2.09  
2.08  
2.07  
2.06  
2.05  
2.04  
2.03  
2.02  
2.01  
2.00  
1.99  
1.98  
1.97  
1.96  
1.95  
1.94  
1.93  
1.92  
1.91  
1.90  
1.89  
1.88  
1.87  
1.86  
1.85  
1.84  
1.83  
1.82  
1.81  
1.80  
1.79  
1.78  
1.77  
1.76  
1.75  
1.74  
1.73  
1.72  
1.71  
1.70  
1.69  
1.68  
1.67  
1.66  
1.65  
1.64  
1.63  
1.62  
1.61  
1.60  
1.59  
1.58  
1.57  
1.56  
1.55  
1.54  
1.53  
1.52  
1.51  
1.50  
1.49  
1.48  
1.47  
1.46  
1.45  
1.44  
1.43  
1.42  
1.41  
1.40  
1.39  
1.38  
1.37  
1.36  
1.35  
1.34  
1.33  
1.32  
1.31  
1.30  
1.29  
1.28  
1.27  
1.26  
1.25  
1.24  
1.23  
1.22  
1.21  
1.20  
1.19  
1.18  
1.17  
1.16  
1.15  
1.14  
1.13  
1.12  
1.11  
1.10  
1.09  
1.08  
1.07  
1.06  
1.05  
1.04  
1.03  
1.02  
1.01  
1.00  
0.99  
0.98  
0.97  
0.96  
0.95  
0.94  
0.93  
0.92  
0.91  
0.90  
0.89  
0.88  
0.87  
0.86  
0.85  
0.84  
0.83  
0.82  
0.81  
0.80  
0.79  
0.78  
0.77  
0.76  
0.75  
0.74  
0.73  
0.72  
0.71  
0.70  
0.69  
0.68  
0.67  
0.66  
0.65  
0.64  
0.63  
0.62  
0.61  
0.60  
0.59  
0.58  
0.57  
0.56  
0.55  
0.54  
0.53  
0.52  
0.51  
0.50  
0.49  
0.48  
0.47  
0.46  
0.45  
0.44  
0.43  
0.42  
0.41  
0.40  
0.39  
0.38  
0.37  
0.36  
0.35  
0.34  
0.33  
0.32  
0.31  
0.30  
0.29  
0.28  
0.27  
0.26  
0.25  
0.24  
0.23  
0.22  
0.21  
0.20  
0.19  
0.18  
0.17  
0.16  
0.15  
0.14  
0.13  
0.12  
0.11  
0.10  
0.09  
0.08  
0.07  
0.06  
0.05  
0.04  
0.03  
0.02  
0.01  
0.00

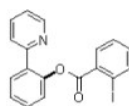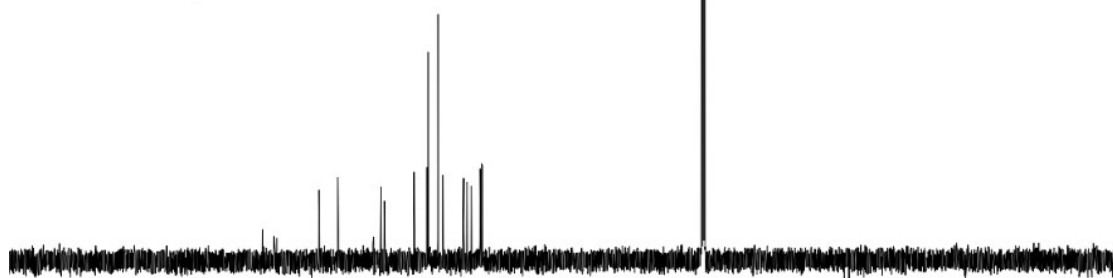

200  
190  
180  
170  
160  
150  
140  
130  
120  
110  
100  
90  
80  
70  
60  
50  
40  
30  
20  
10  
0
